# Supplementary material
Source: PubMed Central journal article supplement (PMC7970386)
Supplement: jama-e213331-s001.pdf [file jama-e213331-s001.pdf]

## Supplemental Online Content

The Writing Committee for the COMEBAC Study Group. Four-month clinical status of a cohort of patients after hospitalization for COVID-19. *JAMA*. Published online March 17, 2021. doi:10.1001/jama.2021.3331

### Table of contents

|                                                                                                                                                                                                                                                |    |
|------------------------------------------------------------------------------------------------------------------------------------------------------------------------------------------------------------------------------------------------|----|
| List of symptoms evaluated at telephone consultation .....                                                                                                                                                                                     | 3  |
| Questionnaire administered during telephone consultation .....                                                                                                                                                                                 | 3  |
| Pulmonary function tests .....                                                                                                                                                                                                                 | 6  |
| Dysfunctional breathing.....                                                                                                                                                                                                                   | 6  |
| Nijmegen questionnaire.....                                                                                                                                                                                                                    | 7  |
| Lung CT scan.....                                                                                                                                                                                                                              | 7  |
| Supplementary table 1. Tests used for psychological, cognitive and respiratory evaluation .....                                                                                                                                                | 8  |
| Supplementary table 2. Baseline and hospitalization characteristics of patients who did not have the telephone assessment and of patients who had the telephone assessment according to their intubation status during the hospital stay ..... | 9  |
| Supplementary table 3. Baseline and hospitalization characteristics and results of the telephone assessment in the 177 patients who attended the ambulatory visit compared to the 117 patients who did not.....                                | 11 |
| Supplementary table 4. Baseline and hospitalization characteristics of the patients who had the telephone assessment classified by symptoms triggering the visit to the outpatient facility.....                                               | 13 |
| Supplementary table 5. Results of the telephone assessment and of the ambulatory visit depending on age (< 75 vs. ≥ 75 yr).....                                                                                                                | 15 |
| Supplementary table 6. Results of the telephone assessment classified by symptoms triggering the visit to the outpatient facility .....                                                                                                        | 17 |
| Supplementary table 7. Results of the ambulatory visit classified by symptoms triggering the visit to the outpatient facility .....                                                                                                            | 18 |
| Supplementary figure 1. Visualization of symptoms* and their overlap presented by the 192 patients (out of 478 patients) who presented at least one symptom at teleconsultation.....                                                           | 19 |
| Supplementary figure 2. Results of the 36-item Short-Form Health Survey (SF-36) and Multidimensional Fatigue Inventory (MFI-20 scale) scores of the patients admitted to the outpatient clinic .....                                           | 20 |

|                                                                                                                  |    |
|------------------------------------------------------------------------------------------------------------------|----|
| Supplementary figure 3. Anti-SARS-CoV-2 serological index of the patients admitted to the outpatient clinic..... | 22 |
| References.....                                                                                                  | 23 |
| Collaborators.....                                                                                               | 24 |

This supplemental material has been provided by the authors to give readers additional information about their work.

## List of symptoms evaluated at telephone consultation

### General signs

- Anorexia
- Fatigue
- New hospitalization
- Weight loss

### Respiratory signs

- New-onset dyspnea
- Chest discomfort, chest pain
- New-onset cough
- Abnormal lung CT-scan since discharge

### Neurologic signs

- Headache
- Paresthesia
- Anosmia
- Limb palsy

### Cognitive signs

- Memory losses
- Slowness for reasoning, activity planification or problem solving
- Concentration, attention difficulties

## Questionnaire administered during telephone consultation

### Consent

*Date of the teleconsultation: [date]*

*Consultant name: [Consultant name]*

*Patient identity: [First name] [Last name], [Date of birth], [Calculated age] years*

*Was admitted in the following departments: [admission department]*

My name is [Consultant name] and I work at Bicêtre hospital. You were admitted in [admission department] for COVID-19 three months ago.

We call you today to organize your follow-up.

If you agree, I will ask you some questions that will be used to orientate your needs of medical follow-up specific to your COVID-19 infection.

May I continue this interview? [YES / NO]

If no, why? [text]

*Is-it the patient him/herself? [YES / NO]*

*If not, who is the respondent [First name] [Last name], [phone number] and relationship to the patient [Spouse, Children, Sibling, Neighbor/Friend, Care giver]*

*Has the patient died since discharge? [YES / NO]*

*If yes, where has the patient died? [Home, Rehabilitation facility, Retirement home, Other hospital inpatient, Other] [date of death] and [cause of death]*

### General inquiry

Do you speak French? [YES / NO]

If not, what language do you speak? [Text]

If not, can someone of your household assist you for the teleconsultation? [YES / NO]

If not, can someone of your household assist you for the day hospital? [YES / NO]

Do you have an insurance? [YES / NO]

On the [date of discharge], you were discharged from Bicêtre hospital. Where did you go? [Home, Rehabilitation facility, Retirement home, Other hospital, Other].

When did you get home? [date]

Are you working at the moment? [YES / NO]

If yes, since when? [date]

What do you do? [Text]

Did you have a significant medical event since your discharge? [YES / NO]

If yes, what was it? [text] When was it? [date]

If yes, were you admitted in a hospital for this event? [YES / NO]

If yes, did you consult a physician? [YES / NO]

If yes, whom? [Text]

If yes, did you do any laboratory or radiologic examination? [YES / NO]

Did you modify your usual treatment since discharge? [YES / NO]

Where do you live now? [Home, Relative, Rehabilitation facility, Retirement home, Other]

Were you living there prior to your hospitalization for COVID19? [YES / NO]

If yes, where were you living prior to your hospitalization for COVID19? [Home, Relative, Rehabilitation facility, Retirement home, Other]

How much did you weigh before your admission? [text]

How much did you weigh when you were discharged? [Text]

How much do you currently weigh? [Text]

Do you have a new and persistent anorexia since your hospitalization?

[YES / NO]

Do you have a new and persistent fatigue since your hospitalization? [YES / NO]

### **Respiratory symptoms**

*In his/her chart, is the patient known to have had a pulmonary embolism during his stay? [YES / NO]*

Do you feel abnormally breathless at rest or when active? [YES / NO]

If yes, did you feel the same prior to your hospitalization? [YES / NO]

How would you rate your dyspnea [mMRC scale 0 to 5]

Do you feel heaviness, pain or chest discomfort at rest or when active? [YES / NO]

If yes, did you feel the same prior to your hospitalization? [YES / NO]

Do you cough every day? [YES / NO]

If yes, was it the same prior to your hospitalization? [YES / NO]

Did you do a chest CT scan since your discharge as it may have been prescribed at your discharge? [YES / NO]

If yes, when [date]?

What was the result? [Normal/Abnormal]

Do you have a CD with the images? [YES / NO]

### **Neurological symptoms**

*In his/her chart, is the patient known to have had an abnormal brain MRI during his stay? [YES / NO]*

*In his/her chart, is the patient known to have had an abnormal brain EEG during his stay? [YES / NO]*

Do you have a new and persistent anosmia since your hospitalization? [YES / NO]

Do you have new and persistent headaches since your hospitalization? [YES / NO]

If yes, on a scale from 1 to 10, 0 being no pain at all and 10 being the worst you could imagine, how much would you rate your headaches related pain? [1-10]

What medication do you take for your headaches? [Text]

Do you have new and persistent paresthesia since your hospitalization? [YES / NO]

Do you have new and persistent burn-like or electric-like pain since your hospitalization? [YES / NO]

Do you have new and persistent loss of function of one of your limbs since your hospitalization? [YES / NO]

### **Cognitive disorder screening (Q3PC)**

During the last 2 weeks, and significantly more than previously, do you:

- Have memory losses (for eg., Missed an appointment, forgotten a recent event, or misplaced a daily object)?  
[Rarely: less than once a week; Sometimes: once a week; Often: Several times a week but not every day; Very often: Almost all the time]
- Feel like you were slower for reasoning, activity planification or problem solving?  
[Rarely: less than once a week; Sometimes: once a week; Often: Several times a week but not every day; Very often: Almost all the time]
- Experience difficulties to concentrate or muster your attention (for eg., follow a conversation, read the paper or follow a tv program)?  
[Rarely: less than once a week; Sometimes: once a week; Often: Several times a week but not every day; Very often: Almost all the time]

### **Elderly**

Regarding corporeal hygiene, do you have:

- [Total autonomy / Partial help / Dependent]
- Deterioration since the hospitalization for COVID19: [YES / NO]

Regarding dressing, do you have:

- [Total autonomy for clothes choice and dressing / Autonomy for clothes choice and dressing, but requires help for / Dependent]
- Deterioration since the hospitalization for COVID19: [YES / NO]

Regarding bathroom use, do you have:

- [Total autonomy for undressing and dressing / Requires help for undressing or dressing / Dependent]
- Deterioration since the hospitalization for COVID19: [YES / NO]

Regarding locomotion, do you have:

- [Total autonomy / Partial help / Bedridden]
- Deterioration since the hospitalization for COVID19: [YES / NO]

Regarding continence, do you have:

- [Continent / Occasional incontinence / Incontinent]
- Deterioration since the hospitalization for COVID19: [YES / NO]

Regarding meals, do you:

- [Eats alone/ Requires help for service, cutting the meat or peeling a fruit/ Dependent]
- Deterioration since the hospitalization for COVID19: [YES / NO]

*Does the patient have 3 or more deterioration in the score? [YES / NO]*

Do you have any helping at home? [YES / NO]

Did you fell since your hospitalization? [YES / NO]

If yes, how many times? [Number]

*If more than twice, are you under a physiotherapist care? [YES / NO]*

*Has the patient lost more than 5kg since discharge? [YES / NO]*

*Did the patient report an altered general state with association of asthenia, anorexia and weight loss? [YES / NO]*

### **Nephrology**

Do you have a known renal disease (e.g., renal transplant recipient, on hemodialysis or any renal chronic condition)? [YES / NO]

*In his/her chart, what is the patient's last known creatinine level and glomerular filtration rate before discharge? [Text]*

### **Ethics**

We would like to inform you that your personal data, recorded during this teleconsultation may be used for medical research under the responsibility of the *Assistance publique-hôpitaux de Paris*. You can refuse now, or any time by contacting us, your primary doctor at the hospital or the data protection officer at the hospital.

*Information was given and the patient did not express refusal: [YES / NO]*

### Pulmonary function tests

Patients completed standard pulmonary function tests (PFTs) with spirometry, whole-body plethysmography and single-breath diffusing lung capacity for carbon monoxide (DLCO) according to the ERS/ATS guidelines<sup>1-3</sup>. Forced vital capacity (FVC), forced expiratory volume in 1 second (FEV1), total lung capacity (TLC) and DLCO were expressed as percentages of predicted values using GLI 2012 and ECCS 1993 equations<sup>4,5</sup>.

### Dysfunctional breathing

Hyperventilation provocation test (HVPT) was based on a methodology previously described<sup>6</sup> and performed using a turbine flowmeter and a face mask (Cosmed, Italy). HVPT was considered positive if at least two daily symptoms were reproduced and/or if an abnormal breathing pattern was identified (i.e. hyperventilation and/or periodic deep sighing as defined elsewhere<sup>7</sup>). Diagnosis of dysfunctional breathing was confirmed if the score of Nijmegen questionnaire was  $\geq 23$  and the HVPT was positive.

## Nijmegen questionnaire

How often do you suffer from the symptoms listed? Please score each item from 0 to 4:

0: never; 1: rarely; 2: sometimes; 3: often; 4: very often

| Symptoms                                      | Score (from 0 to 4) |
|-----------------------------------------------|---------------------|
| Chest pain                                    |                     |
| Feeling tense                                 |                     |
| Blurred vision                                |                     |
| Dizzy spells                                  |                     |
| To be confused, losing touch with environment |                     |
| Accelerated or deepened breathing             |                     |
| Shortness of breath                           |                     |
| Constricted chest                             |                     |
| Bloated abdominal sensation                   |                     |
| Unable to breathe deeply                      |                     |
| Tingling fingers                              |                     |
| Stiffness of fingers or arms                  |                     |
| Tightness around the mouth                    |                     |
| Cold hands or feet                            |                     |
| Palpitations                                  |                     |
| Anxiety                                       |                     |
| <b>Total score</b>                            | <b>/64</b>          |

A score > 22 suggests dysfunctional breathing.

## Lung CT scan

All images were acquired at the end of inhalation using a 2 x 128 -row CT scanner (Somatom Flash, Siemens, Erlangen, Germany). Acquisition parameters were set as follows: tube voltage of 120 kV, automatic tube current modulation of 100–300 mA, pitch of 0.5 mm, matrix of 512 × 512, slice thickness of 1.0 mm. All images were then reconstructed with a slice of 1.0 mm with the same increment in mediastinal and parenchymal windows.

Supplementary table 1. Tests used for psychological, cognitive and respiratory evaluation

| Test                                                                             | Self evaluation (Yes/No) | Symptom Assessed                                           | Best score | Worst score | Chosen diagnostic cut-off |
|----------------------------------------------------------------------------------|--------------------------|------------------------------------------------------------|------------|-------------|---------------------------|
| European AIDS Clinical Society cognitive screening questions (Q3PC) <sup>8</sup> | No                       | Memory difficulties/mental slowness/concentration problems | N/A        | N/A         | ≥1 positive answer        |
| SF36 <sup>9</sup>                                                                |                          | 8 dimensions of general health                             | 0          | 100         | No cut-off value          |
| MF120                                                                            | Yes                      | 4 dimensions of fatigue                                    | 5          | 0           | No cut-off value          |
| Beck Depression Inventory 13 items (BDI-13) <sup>11</sup>                        | Yes                      | Depression                                                 | 0          | 39          | >7                        |
| Hamilton Anxiety and Depression scale - Anxiety (HAD-A) <sup>12</sup>            | Yes                      | Anxiety                                                    | 0          | 21          | >7                        |
| Post-traumatic Stress Disorder Checklist for DSM-5 (PCL-5) <sup>13</sup>         | Yes                      | Post Traumatic Stress                                      | 0          | 80          | >30                       |
| Insomnia Severity Index <sup>14</sup> (ISI)                                      | Yes                      | Insomnia                                                   | 0          | 28          | >7                        |
| Montreal Cognitive Assessment (MoCA) scale <sup>15</sup>                         | No                       | Global cognitive functioning                               | 30         | 0           | <21 to <25*               |
| Mac NAIR <sup>16</sup>                                                           | Yes                      | Memory Complaint                                           | 0          | 156         | >54 to >66**              |
| d2-R <sup>17</sup>                                                               | No                       | Attention                                                  | 135        | 65***       | <76                       |
| Nijmegen questionnaire <sup>7</sup>                                              | No                       | Dysfunctional breathing                                    | 0          | 64          | >22                       |

\* depends on age and educational level

\*\* depends on age

\*\*\* mean score is 100 with standard deviation of 15



Supplementary table 2. Baseline and hospitalization characteristics of patients who did not have the telephone assessment and of patients who had the telephone assessment according to their intubation status during the hospital stay

|                                                           | Patients who had the telephone consultation        |                                |                           | Patients who did not have the telephone consultation (n=673) |
|-----------------------------------------------------------|----------------------------------------------------|--------------------------------|---------------------------|--------------------------------------------------------------|
|                                                           | All patients (N=478)                               | Non-intubated patients (n=405) | Intubated patients (n=73) |                                                              |
| <b>Age, years, mean (SD)</b>                              | 60.9 (16.1)                                        | 61.4 (17.0)                    | 58.4 (10.1)               | 67.7 (20.7)                                                  |
| <b>Women/men No. (%)</b>                                  | 201 (42.1)/ 277 (57.9)                             | 183 (45.2)/ 222 (54.8)         | 18 (24.7)/ 55 (73.3)      | 305 (45.3)/ 368 (54.7)                                       |
| <b>Body mass index, kg/m<sup>2</sup>, mean (SD) [No.]</b> | 28.8 (5.6) [351]                                   | 28.6 (5.8) [281]               | 29.5 (4.9) [70]           |                                                              |
| <b>Comorbidities, No. (%)</b>                             |                                                    |                                |                           |                                                              |
| Hypertension                                              | 225 (47.1)                                         | 183 (45.2)                     | 42 (57.5)                 |                                                              |
| Obesity, No./total (%)                                    | 130/351 (37.0)                                     | 98/281 (34.9)                  | 32/70 (45.7)              |                                                              |
| Diabetes mellitus                                         | 128 (26.8)                                         | 101 (24.9)                     | 27 (37.0)                 |                                                              |
| Chronic heart disease                                     | 77 (16.1)                                          | 69 (17.0)                      | 8 (11.0)                  |                                                              |
| Respiratory disease (other than COPD)                     | 75 (15.7)                                          | 68 (16.8)                      | 7 (9.59)                  |                                                              |
| Chronic kidney disease                                    | 51 (10.7)                                          | 41 (10.1)                      | 10 (13.7)                 |                                                              |
| Declared psychiatric disorder                             | 42 (8.8)                                           | 35 (8.6)                       | 7 (9.6)                   |                                                              |
| Neurodegenerative disorder                                | 34 (7.1)                                           | 34 (8.4)                       | 0 (0.0)                   |                                                              |
| Alcohol abuse, No./total (%)                              | 21/450 (4.7)                                       | 17/382 (4.5)                   | 4/68 (5.6)                |                                                              |
| Active cancer                                             | 18 (3.8)                                           | 16 (4.0)                       | 2 (2.7)                   |                                                              |
| Other immunosuppression                                   | 18 (3.8)                                           | 15 (3.7)                       | 3 (4.1)                   |                                                              |
| COPD                                                      | 17 (3.6)                                           | 15 (3.7)                       | 2 (2.7)                   |                                                              |
| Chronic dialysis                                          | 17 (3.6)                                           | 13 (3.2)                       | 4 (5.5)                   |                                                              |
| HIV infection                                             | 12 (2.5)                                           | 10 (2.5)                       | 2 (2.7)                   |                                                              |
| Solid organ transplantation                               | 9 (1.9)                                            | 6 (1.5)                        | 3 (4.1)                   |                                                              |
| Liver disease                                             | 7 (1.5)                                            | 6 (1.5)                        | 1 (1.4)                   |                                                              |
| Pregnancy                                                 | 5 (1.1)                                            | 4 (1.0)                        | 1 (1.4)                   |                                                              |
| Bone marrow transplantation                               | 2 (0.4)                                            | 1 (0.3)                        | 1 (1.4)                   |                                                              |
| <b>Smoking, No./total (%)</b>                             |                                                    |                                |                           |                                                              |
| No (<5 PY)                                                | 343/452 (75.9)                                     | 293/383 (76.5)                 | 50/69 (72.5)              |                                                              |
| Former (> 5 PY)                                           | 83/452 (18.4)                                      | 73/383 (19.1)                  | 10/69 (14.5)              |                                                              |
| Active                                                    | 26/452 (5.8)                                       | 17/383 (4.4)                   | 9/69 (13.0)               |                                                              |
| <b>Specific treatments, No. (%)</b>                       |                                                    |                                |                           |                                                              |
| Azithromycin                                              | 120 (25.1)                                         | 98 (24.2)                      | 22 (30.1)                 |                                                              |
| Tocilizumab (anti-IL6)                                    | 37 (7.7)                                           | 23 (5.7)                       | 14 (19.2)                 |                                                              |
| Hydroxychloroquine                                        | 32 (6.7)                                           | 20 (4.9)                       | 12 (16.4)                 |                                                              |
| <b>Supplementary table 2 (continued)</b>                  | <b>Patients who had the telephone consultation</b> |                                |                           | <b>Patients who did not have</b>                             |

|                                                                   | All patients<br>(N=478) | Non-intubated<br>patients (n=405) | Intubated patients<br>(n=73) | the telephone<br>consultation<br>(n=673) |
|-------------------------------------------------------------------|-------------------------|-----------------------------------|------------------------------|------------------------------------------|
| <b>Specific treatments, No. (%)</b>                               |                         |                                   |                              |                                          |
| Corticosteroids                                                   | 24 (5.0)                | 13 (3.2)                          | 11 (15.1)                    |                                          |
| Lopinavir/Ritonavir                                               | 16 (3.4)                | 11 (2.7)                          | 5 (6.9)                      |                                          |
| Anakinra (anti-IL1RA)                                             | 11 (2.3)                | 8 (2.0)                           | 3 (4.1)                      |                                          |
| Remdesivir                                                        | 5 (1.1)                 | 5 (1.2)                           | 0 (0.0)                      |                                          |
| <b>Vasopressors, No. (%)</b>                                      | 74 (15.5)               | 10 (2.5)                          | 64 (87.7)                    |                                          |
| <b>Active anticoagulation (at full therapeutic dose), No. (%)</b> | 75 (15.7)               | 48 (11.9)                         | 27 (37.0)                    |                                          |
| <b>Pulmonary embolism during hospitalization, No. (%)</b>         | 41 (8.6)                | 29 (7.2)                          | 12 (16.4)                    |                                          |
| <b>Acute kidney injury during hospitalization, No. (%)</b>        | 95 (19.9)               | 58 (14.3)                         | 37 (50.7)                    |                                          |
| <b>Hospitalization in ICU, No. (%)</b>                            | 142 (29.7)              | 69 (17.0)                         | 73 (100)                     | 276 (24.0)                               |
| <b>Duration of ICU stay, days, median [Q1;Q3]</b>                 | 9 [4;19]                | 4 [3;6]                           | 18 [11;32]                   |                                          |
| <b>Total duration of hospitalization, days, median [Q1;Q3]</b>    | 9 [4;15]                | 8 [4;12]                          | 27 [17;49]                   |                                          |

COPD: chronic obstructive pulmonary disease, ECMO: extracorporeal membrane oxygenation, HIV: human immunodeficiency virus, ICU: intensive care unit, PY: pack year.

Supplementary table 3. Baseline and hospitalization characteristics and results of the telephone assessment in the 177 patients who attended the ambulatory visit compared to the 117 patients who did not

|                                                      | Attended the ambulatory visit (n=177) | Did not attend the ambulatory visit (n=117) |
|------------------------------------------------------|---------------------------------------|---------------------------------------------|
| <b>Baseline and hospitalization characteristics</b>  |                                       |                                             |
| Age, years                                           | 56.9 (13.2)                           | 66.3 (17.5)                                 |
| Women/men No. (%)                                    | 68 (38.4)/109 (61.6)                  | 49 (41.9)/68 (58.1)                         |
| Body mass index, kg/m <sup>2</sup> , mean (SD) [No.] | 29.1 (5.4) [165]                      | 28.8 (5.6) [77]                             |
| <b>Comorbidities, No. (%)</b>                        |                                       |                                             |
| Hypertension                                         | 75 (42.4)                             | 62 (53.0)                                   |
| Obesity, No./total (%)                               | 67/165 (40.6)                         | 28/77 (36.4)                                |
| Diabetes mellitus                                    | 52 (29.4)                             | 33 (28.2)                                   |
| Chronic heart disease                                | 14 (7.91)                             | 30 (25.6)                                   |
| Respiratory disease (other than COPD)                | 30 (16.9)                             | 20 (17.1)                                   |
| Chronic kidney disease                               | 17 (9.60)                             | 16 (13.7)                                   |
| Declared psychiatric disorder                        | 12 (6.78)                             | 14 (12.0)                                   |
| Neurodegenerative disorder                           | 2 (1.13)                              | 18 (15.4)                                   |
| Alcohol abuse, No./total (%)                         | 9/168 (5.4)                           | 5/109 (4.6)                                 |
| Active cancer                                        | 3 (1.7)                               | 8 (6.8)                                     |
| Other immunosuppression                              | 7 (4.0)                               | 5 (4.3)                                     |
| COPD                                                 | 5 (2.8)                               | 6 (5.1)                                     |
| Chronic dialysis                                     | 6 (3.4)                               | 5 (4.3)                                     |
| HIV infection                                        | 3 (1.7)                               | 5 (4.3)                                     |
| Solid organ transplantation                          | 4 (2.3)                               | 3 (2.6)                                     |
| Liver disease                                        | 5 (2.8)                               | 1 (0.9)                                     |
| Pregnancy                                            | 2 (1.1)                               | 2 (1.7)                                     |
| Bone marrow transplantation                          | 0 (0)                                 | 0 (0)                                       |
| <b>Smoking, No./total (%)</b>                        |                                       |                                             |
| No (<5 PY)                                           | 129/169 (76.3)                        | 83/110 (75.5)                               |
| Former (> 5 PY)                                      | 25/169 (14.8)                         | 23/110 (20.9)                               |
| Active                                               | 15/169 (8.9)                          | 4/110 (3.6)                                 |
| <b>Specific treatments, No. (%)</b>                  |                                       |                                             |
| Azithromycin                                         | 53 (29.9)                             | 29 (24.8)                                   |
| Tocilizumab (anti-IL6)                               | 27 (15.3)                             | 4 (3.4)                                     |
| Hydroxychloroquine                                   | 18 (10.2)                             | 8 (6.4)                                     |
| Corticosteroids                                      | 7 (4.0)                               | 10 (8.6)                                    |
| Lopinavir/Ritonavir                                  | 8 (4.5)                               | 3 (2.6)                                     |
| Anakinra (anti-IL1RA)                                | 8 (4.5)                               | 1 (0.9)                                     |
| Remdesivir                                           | 3 (1.7)                               | 0 (0.0)                                     |
| Pressors use                                         | 51 (28.8)                             | 18 (15.4)                                   |
| Therapeutic anticoagulation                          | 49 (27.7)                             | 17 (14.5)                                   |
| Pulmonary embolism during hospitalization, n (%)     | 29 (19.1)                             | 10 (9.26)                                   |
| Acute kidney injury during hospitalization, n (%)    | 57 (32.2)                             | 43 (36.8)                                   |
| Hospitalization in ICU, No. (%)                      | 97 (54.8)                             | 38 (32.5)                                   |

| <i>Supplementary table 3 (continued)</i>                                  | <b>Attended the ambulatory visit (n=177)</b> | <b>Did not attend the ambulatory visit (n=117)</b> |
|---------------------------------------------------------------------------|----------------------------------------------|----------------------------------------------------|
| <b>Duration of ICU stay, days</b>                                         | 9.00 [4.00;22.0]                             | 8.00 [4.00;16.0]                                   |
| <b>Total duration of hospitalization, days</b>                            | 13.0 [6.00;23.0]                             | 9.00 [6.00;13.0]                                   |
| <b>Telephone consultation<sup>a</sup></b>                                 |                                              |                                                    |
| Time from hospital discharge to teleconsultation, days median [IQR] (No.) | 104 [86.8;120]                               | 114 [96.0;128]                                     |
| Anosmia, No./total (%)                                                    | 16 (10.5)                                    | 5 (4.7)                                            |
| Headaches, No./total (%)                                                  | 14 (9.2)                                     | 8 (7.5)                                            |
| Paresthesia, No./total (%)                                                | 37 (24.3)                                    | 11 (10.3)                                          |
| Anorexia                                                                  | 17/164 (10.4)                                | 13/108 (12.0)                                      |
| Fatigue                                                                   | 78/165 (47.3)                                | 32/104 (30.8)                                      |
| Weight loss >5% baseline weight                                           | 10/148 (6.8)                                 | 6/78 (7.7)                                         |
| Chest discomfort/pain                                                     | 23/151 (15.2)                                | 8/106 (7.6)                                        |
| Cough                                                                     | 11/152 (7.2)                                 | 9/106 (8.5)                                        |
| Limb palsy                                                                | 19/150 (12.7)                                | 16/107 (15.0)                                      |
| Memory difficulties (Q3PC questionnaire <sup>b</sup> ), No./total (%)     | 33/152 (21.7)                                | 34/103 (33.0)                                      |
| Mental slowness (Q3PC questionnaire <sup>b</sup> ), No./total (%)         | 22/152 (14.5)                                | 19/103 (18.4)                                      |
| Concentration problems (Q3PC questionnaire <sup>b</sup> ), No./total (%)  | 20/150 (13.3)                                | 18/102 (17.6)                                      |
| Dyspnea, n (%)                                                            | 77 (43.5)                                    | 0 (0.00)                                           |

**COPD: chronic obstructive pulmonary disease, ECMO: extracorporeal membrane oxygenation, HIV: human immunodeficiency virus, ICU: intensive care unit, PY: pack year, TC: telephone consultation**

<sup>a</sup> Signs were declared as newly-onset during, since or after hospitalization for COVID-19 and persistent at the time of telephone assessment

<sup>b</sup> The range, direction and characteristics of the Q3PC questionnaire can be found in Supp Table 1

Supplementary table 4. Baseline and hospitalization characteristics of the patients who had the telephone assessment classified by symptoms triggering the visit to the outpatient facility

|                                                           | Persistent neuro-cognitive symptoms<br>(n=44) | Persistent respiratory symptoms (n=27) | Abnormal CT-scan<br>(n=15) |
|-----------------------------------------------------------|-----------------------------------------------|----------------------------------------|----------------------------|
| <b>Age, years</b>                                         | 58.3 (14.1)                                   | 58.4 (17.9)                            | 58.1 (12.0)                |
| <b>Women/men No. (%)</b>                                  | 26 (59.1) / 18 (40.9)                         | 18 (66.7) / 9 (33.3)                   | 7 (46.7) / 8 (53.3)        |
| <b>Body mass index, kg/m<sup>2</sup>, mean (SD) [No.]</b> | 29.1 (4.9) [42]                               | 29.9 (5.5) [27]                        | 27.7 (6.9) [15]            |
| <b>Comorbidities, No. (%)</b>                             |                                               |                                        |                            |
| Hypertension                                              | 16 (36.4)                                     | 12 (44.4)                              | 5 (33.3)                   |
| Obesity, No./total (%)                                    | 16/42 (38.1)                                  | 11/27 (40.7)                           | 4/15 (26.7)                |
| Diabetes mellitus                                         | 11 (25.0)                                     | 8 (29.6)                               | 2 (13.3)                   |
| Chronic cardiac disease                                   | 4 (9.1)                                       | 2 (7.4)                                | 1 (6.7)                    |
| Respiratory disease (other than COPD)                     | 7 (15.9)                                      | 4 (14.8)                               | 4 (26.7)                   |
| Chronic kidney disease                                    | 2 (4.6)                                       | 1 (3.7)                                | 0 (0)                      |
| Declared psychiatric disorder                             | 3 (6.82)                                      | 3 (11.1)                               | 0 (0)                      |
| Neurodegenerative disorder                                | 1 (2.3)                                       | 1 (3.7)                                | 0 (0)                      |
| Alcohol abuse, No./total (%)                              | 4/42 (9.5)                                    | 0/25 (0)                               | 2/15 (13.3)                |
| Active cancer                                             | 2 (4.6)                                       | 1 (3.7)                                | 1 (6.7)                    |
| Other immunosuppression                                   | 0 (0)                                         | 1 (3.7)                                | 2 (13.3)                   |
| COPD                                                      | 3 (6.8)                                       | 3 (11.1)                               | 0 (0)                      |
| Chronic dialysis                                          | 1 (2.3)                                       | 0 (0)                                  | 0 (0)                      |
| HIV infection                                             | 2 (4.6)                                       | 0 (0)                                  | 0 (0)                      |
| Solid organ transplantation                               | 1 (2.3)                                       | 0 (0)                                  | 1 (6.7)                    |
| Liver disease                                             | 2 (4.6)                                       | 0 (0)                                  | 2 (13.3)                   |
| Pregnancy                                                 | 0 (0)                                         | 0 (0)                                  | 0 (0)                      |
| Bone marrow transplantation                               | 0 (0)                                         | 0 (0)                                  | 0 (0)                      |
| <b>Smoking, No./total (%)</b>                             |                                               |                                        |                            |
| No (<5 PY)                                                | 33/42 (78.6)                                  | 23/25 (92.0)                           | 13/15 (86.7)               |
| Former (> 5 PY)                                           | 5/42 (11.9)                                   | 1/25 (4.00)                            | 1/15 (6.7)                 |
| Active                                                    | 4/42 (9.5)                                    | 1/25 (4.00)                            | 1/15 (6.7)                 |
| <b>Specific treatments, No. (%)</b>                       |                                               |                                        |                            |
| Azithromycin                                              | 13 (29.5)                                     | 6 (22.2)                               | 7 (46.7)                   |
| Tocilizumab (anti-IL6)                                    | 2 (4.6)                                       | 3 (11.1)                               | 1 (6.7)                    |
| Hydroxychloroquine                                        | 1 (2.3)                                       | 1 (3.7)                                | 0 (0)                      |
| Corticosteroids                                           | 0 (0)                                         | 0 (0)                                  | 0 (0)                      |
| Lopinavir/Ritonavir                                       | 1 (2.3)                                       | 1 (3.70)                               | 2 (13.3)                   |
| Anakinra (anti-IL1RA)                                     | 1 (2.3)                                       | 0 (0)                                  | 0 (0)                      |
| Remdesivir                                                | 2 (4.6)                                       | 1 (3.7)                                | 2 (13.3)                   |
| <b>Pressors use</b>                                       | 0 (0)                                         | 0 (0)                                  | 0 (0)                      |
| <b>Therapeutic anticoagulation</b>                        | 10 (22.7)                                     | 9 (33.3)                               | 2 (13.3)                   |

| <i>Supplementary table 4 (continued)</i>          | Persistent neuro-cognitive symptoms (n=44) | Persistent respiratory symptoms (n=27) | Abnormal CT-scan (n=15) |
|---------------------------------------------------|--------------------------------------------|----------------------------------------|-------------------------|
| Pulmonary embolism during hospitalization, n (%)  | 9 (20.5)                                   | 7 (25.9)                               | 1 (6.7)                 |
| Acute kidney injury during hospitalization, n (%) | 6 (13.6)                                   | 3 (11.1)                               | 4 (26.7)                |
| Hospitalization in ICU, No. (%)                   | 0 (0)                                      | 0 (0)                                  | 0 (0)                   |
| Duration of ICU stay, days [Q1;Q3]                | 0 [0;0]                                    | 0 [0;0]                                | 0 [0;0]                 |
| Total duration of hospitalization, days [Q1;Q3]   | 6 [3;11]                                   | 6 [3;13]                               | 9 [6;11]                |

Data are presented as No. (%), mean (SD) or median [Q1;Q3]. COPD: chronic obstructive pulmonary disease, ECMO: extracorporeal membrane oxygenation, HIV: human immunodeficiency virus, ICU: intensive care unit, PY: pack year.

Supplementary table 5. Results of the telephone assessment and of the ambulatory visit depending on age (< 75 vs. ≥ 75 yr)

|                                                                                      | All patients<br>(n=478) | Patients <75 yr,<br>(n=382) | Patients ≥75 yr,<br>(n=96) |
|--------------------------------------------------------------------------------------|-------------------------|-----------------------------|----------------------------|
| <b>Telephone assessment</b>                                                          |                         |                             |                            |
| <b>Delay between hospital discharge and telephone assessment, days [Q1;Q3] (No.)</b> |                         |                             |                            |
|                                                                                      | 113 [94;128] (435)      | 112 [95;127] (352)          | 113 [93;132] (90)          |
| Anosmia <sup>a</sup> , n(%)                                                          | 25/419 (6.0)            | 24/335 (7.2)                | 1/84 (1.2)                 |
| Headaches <sup>a</sup> , No./total (%)                                               | 23/420 (5.5)            | 22/334 (6.6)                | 1/86 (1.2)                 |
| Paresthesia <sup>a</sup> , No./total (%)                                             | 51/421 (12.1)           | 46/335 (13.7)               | 5/86 (5.8)                 |
| Anorexia <sup>a</sup> , No./total (%)                                                | 34/436 (7.8)            | 25/348 (7.2)                | 9/88 (10.2)                |
| Fatigue <sup>a</sup> , No./total (%)                                                 | 134/431 (31.1)          | 111/344 (32.3)              | 23/87 (26.4)               |
| Weight loss >5% baseline weight <sup>a</sup> , No./total (%)                         | 31/342 (9.1)            | 28/286 (9.8)                | 3/56 (5.4)                 |
| Chest discomfort/pain <sup>a</sup> , No./total (%)                                   | 34/419 (8.1)            | 33/332 (9.9)                | 1/86 (1.2)                 |
| Cough <sup>a</sup> , No./total (%)                                                   | 21/420 (5.0)            | 19/335 (5.7)                | 2/85 (2.4)                 |
| Limb palsy <sup>a</sup> , No./total (%)                                              | 40/419 (9.6)            | 28/334 (8.4)                | 12/85 (14.1)               |
| Memory difficulties (Q3PC questionnaire <sup>b</sup> ), No./total (%)                | 73/416 (17.5)           | 55/332 (16.6)               | 18/84 (21.4)               |
| Mental slowness (Q3PC questionnaire <sup>b</sup> ), No./total (%)                    | 42/415 (10.1)           | 32/331 (9.7)                | 10/84 (11.9)               |
| Concentration problems (Q3PC questionnaire <sup>b</sup> ), No./total (%)             | 41/412 (9.95)           | 31/331 (9.42)               | 10/84 (12)                 |
| Dyspnea <sup>a</sup> , No./total (%)                                                 | 78 (16.3)               | 75/329 (19.6)               | 3/83 (3.1)                 |
| <b>Ambulatory visit</b>                                                              |                         |                             |                            |
| <b>Delay between hospital discharge and ambulatory visit, days [Q1;Q3] (No.)</b>     |                         |                             |                            |
|                                                                                      | 126 [107;144] (157)     | 125 [106;144] (143)         | 132 [108;150] (14)         |
| <b>Respiratory assessment</b>                                                        |                         |                             |                            |
| mMRC scale for dyspnea [Q1;Q3] (No.)                                                 | 1 [1;2] (115)           | 1 [1;2] (108)               | 3 [2;3] (7)                |
| Cough, No./total (%)                                                                 | 23/172 (13.4)           | 22/158 (13.9)               | 1/14 (7.1)                 |
| 6-min walk test, median [IQR], m, (No.)                                              | 462 [380;507] (161)     | 474 [397;510] (149)         | 248 [186;305] (12)         |
| Abnormal lung CT scan, No./total (%)                                                 | 108/170 (63.2)          | 94/157 (59.9)               | 14/14 (100)                |
| Persistent ground glass opacities, No./total (%)                                     | 72/170 (42.4)           | 64/156 (41)                 | 8/14 (57.1)                |
| Lung fibrotic lesions, No./total (%)                                                 | 33/170 (19.4)           | 30/156 (19.2)               | 3/14 (21.4)                |
| FEV1 (expressed as % of theory) [Q1;Q3] (No.)                                        | 92 [80;102] (157)       | 92 [80;102] (151)           | 86.3 [75;106] (6)          |

| <b>Supplemental table 5<br/>(continued)</b>                                                       | <b>All patients<br/>(n=478)</b> | <b>Patients &lt;75 yr,<br/>(n=382)</b> | <b>Patients ≥ 75 yr,<br/>(n=96)</b> |
|---------------------------------------------------------------------------------------------------|---------------------------------|----------------------------------------|-------------------------------------|
| FEV1/FVC [Q1;Q3] (No.)                                                                            | 83 [79;87] (157)                | 83 [79;86] (157)                       | 85 [77;91] (7)                      |
| TLC (expressed as % of theory), mean (SD), [No.]                                                  | 83(15.3) [149]                  | 83 (15.2) [144]                        | 80 (17.4) [5]                       |
| <b>DLCO &lt; 70, No./total (%)</b>                                                                | 33/152 (21.7)                   | 31/149 (20.8)                          | 2/3 (66.7)                          |
| <b>Echocardiography assessment</b>                                                                |                                 |                                        |                                     |
| RV dilation on echocardiography, No./total (%)                                                    | 20/79 (25.3)                    | 19/77 (24.7)                           | 1/2 (50)                            |
| LVEF 40-50% on echocardiography <sup>c</sup> , No./total (%)                                      | 10/83 (12.0)                    | 10/81 (12.3)                           | 0/2 (0)                             |
| <b>Supplementary table 2<br/>(continued)</b>                                                      |                                 |                                        |                                     |
| <b>Neurological and psychological assessment<sup>a, b</sup></b>                                   |                                 |                                        |                                     |
| Cognitive complaint (impaired McNair score and/or who reported cognitive symptoms), No./total (%) | 79/159 (49.7)                   | 78/150 (52.0)                          | 1/9 (11.1)                          |
| Cognitive impairment (impairment of either MoCA or d2-R scores), No./total (%)                    | 61/159 (38.4)                   | 59/150 (39.3)                          | 2/9 (22.2)                          |
| Symptoms of anxiety (HADS-Anxiety scale), No./total (%)                                           | 53/169 (31.4)                   | 50/156 (32.1)                          | 3/13 (23.1)                         |
| Symptoms of depression (BDI test), No./total (%)                                                  | 35/170 (20.6)                   | 31/157 (19.7)                          | 4/13 (30.8)                         |
| Insomnia (ISI score), No./total (%)                                                               | 90/168 (53.6)                   | 82/155 (52.9)                          | 8/13 (61.5)                         |
| Symptoms of PTSD (PCL-5 score), No./total (%)                                                     | 24/169 (14.2)                   | 22/156 (14.1)                          | 2/13 (15.4)                         |

**CT: computed tomography, DLCO: diffusing capacity of the lungs for carbon monoxide, FEV1: forced expiratory volume in one second, FVC: forced vital capacity, ICU: intensive care unit, LVEF: left ventricular ejection fraction, PTSD: post-traumatic stress disorder, RV: right ventricular, TLC: total lung capacity.**

<sup>a</sup> Signs were declared as newly-onset during, since or after hospitalization for COVID-19 and per the time of assessment at the outpatient facility.

<sup>b</sup> The range, direction and characteristics of the McNair, MoCA and d2R scores, of the HADS-Anxiety of the BDI test, and of the ISI and PCL-5 scores can be found in Supp Table 1.

<sup>c</sup> No patient had an LVEF <40%.



Supplementary table 6. Results of the telephone assessment classified by symptoms triggering the visit to the outpatient facility

|                                                                                       | Persistent neuro-cognitive symptoms (n=44) | Persistent respiratory symptoms (n=27) | Abnormal CT -scan (n=15) |
|---------------------------------------------------------------------------------------|--------------------------------------------|----------------------------------------|--------------------------|
| Time from hospital discharge to teleconsultation, days median [Q1;Q3] (No.)           | 119 [103;131]                              | 111 [104;130]                          | 120 [102;126]            |
| Anosmia <sup>a</sup> , No./total (%)                                                  | 5/44 (11.4)                                | 5/27 (18.5)                            | 3/15 (20.0)              |
| Headaches <sup>a</sup> , No./total (%)                                                | 11/44 (25.0)                               | 5/27 (18.5)                            | 2/15 (13.3)              |
| Paresthesia <sup>a</sup> , No./total (%)                                              | 18/44 (40.9)                               | 9/27 (33.3)                            | 5/15 (33.3)              |
| Memory difficulties <sup>a</sup> (Q3PC questionnaire <sup>b</sup> ), No./total (%)    | 24/44 (54.5)                               | 11/27 (40.7)                           | 5/15 (33.3)              |
| Mental slowness <sup>a</sup> (Q3PC questionnaire <sup>b</sup> ), No./total (%)        | 16/44 (36.4)                               | 6/27 (22.2)                            | 4/15 (26.7)              |
| Concentration problems <sup>a</sup> (Q3PC questionnaire <sup>b</sup> ), No./total (%) | 14/43 (32.6)                               | 7/27 (25.9)                            | 2/15 (13.3)              |
| Abnormal persistent or new dyspnea, n (%)                                             | 22 (50.0)                                  | 13 (48.1)                              | 6 (40.0)                 |

<sup>a</sup> Signs were declared as newly-onset during, since or after hospitalization for COVID-19 and persistent at the time of assessment at telephone assessment.

<sup>b</sup> The range, direction and characteristics of the Q3PC questionnaire can be found in Supp Table 1.

Supplementary table 7. Results of the ambulatory visit classified by symptoms triggering the visit to the outpatient facility

|                                                                                               | Persistent neurological symptoms (n=44) <sup>d</sup> | Persistent respiratory symptoms (n=27) <sup>d</sup> | Abnormal CT-scan (n=15) <sup>d</sup> |
|-----------------------------------------------------------------------------------------------|------------------------------------------------------|-----------------------------------------------------|--------------------------------------|
| Time from hospital discharge to ambulatory visit, days, median [Q1;Q3] (No.)                  | 139 [119;154] (38)                                   | 130 [116;147] (26)                                  | 144 [117;156] (14)                   |
| <b>Respiratory assessment<sup>a</sup></b>                                                     |                                                      |                                                     |                                      |
| mMRC scale for dyspnea <sup>a</sup> , median [Q1;Q3] (No.)                                    | 1.0 [1.0;2.0] (37)                                   | 2.0 [1.0;2.0] (22)                                  | 1.0 [1.0;2.0] (15)                   |
| Persisting cough <sup>a</sup> , No./total (%)                                                 | 9/43 (20.9)                                          | 7/26 (26.9)                                         | 2/15 (13.3)                          |
| 6-min walk test, median [IQR], m, (No.)                                                       | 651 [585;712] (42)                                   | 390 [330;480] (23)                                  | 462 [381-542] (14)                   |
| Abnormal lung CT scan, No./total (%)                                                          | 18/42 (42.9)                                         | 10/26 (38.5)                                        | 10/15 (66.7)                         |
| Persisting ground glass opacities No./total (%)                                               | 12/42 (28.6)                                         | 8/25 (32.0)                                         | 6/15 (40.0)                          |
| Lung fibrotic lesions, No./total (%)                                                          | 2/42 (4.76)                                          | 3/25 (12.0)                                         | 0/15(0)                              |
| FEV1 (expressed as % of theory), median [Q1;Q3] (No.)                                         | 91 [79;102] (35)                                     | 92 [81;99] (23)                                     | 101 [94;104] (12)                    |
| FEV1/FVC, median [Q1;Q3] (No.)                                                                | 80 [77;86] (35)                                      | 83 [77;87] (23)                                     | 82 [80;84] (12)                      |
| TLC (expressed as % of theory)                                                                | 85 (12.0) [34]                                       | 88 (10.7) [22]                                      | 88 (12.8)                            |
| DLCO <70%, No./total (%)                                                                      | 2 (6.1) (33)                                         | 3/22 (13.6)                                         | 0/12 (0)                             |
| <b>Echocardiography assessment</b>                                                            |                                                      |                                                     |                                      |
| RV dilation on echocardiography, No./total (%)                                                | 2/4 (50.0)                                           | 0/2 (0)                                             |                                      |
| LVEF 40-50% on echocardiography <sup>b</sup> , No./total (%)                                  | 0/4 (0)                                              | 0/2 (0)                                             |                                      |
| <b>Neurological and psychic assessment<sup>a, c</sup></b>                                     |                                                      |                                                     |                                      |
| Cognitive complaint (impaired McNair score and/or reported cognitive symptoms), No./total (%) | 26/40 (65)                                           | 11/22 (50)                                          | 7/15 (46.7)                          |
| Cognitive impairment (impairment of either MoCA or d2-R scores), No./total (%)                | 14/40 (35.0)                                         | 6/22 (27.3)                                         | 6/15 (40.0)                          |
| Symptoms of anxiety (HADS-Anxiety scale), No./total (%)                                       | 19/40 (47.5)                                         | 10/23 (43.5)                                        | 4/15 (26.7)                          |
| Symptoms of depression (BDI test), No./total (%)                                              | 15/40 (37.5)                                         | 10/23 (43.5)                                        | 3/15 (20.0)                          |
| Insomnia (ISI score), No./total (%)                                                           | 29/40 (72.5)                                         | 15/23 (65.2)                                        | 12/15 (80.0)                         |
| Symptoms of PTSD (PCL-5 score), No./total (%)                                                 | 14/40 (35.0)                                         | 7/23 (30.4)                                         | 2/15 (13.3)                          |

CT: computed tomography, DLCO: diffusing capacity of the lungs for carbon monoxide, FEV1: forced expiratory volume in one second, FVC: forced vital capacity, ICU: intensive care unit, LVEF: left ventricular ejection fraction, PTSD: post-traumatic stress disorder, RV: right ventricular, TLC: total lung capacity

<sup>a</sup> Signs were declared as newly-onset during, since or after hospitalization for COVID-19 and persistent at the time of assessment at the outpatient facility.

<sup>b</sup> No patient had an LVEF <40%.

<sup>c</sup> The range, direction and characteristics of the McNair, MoCA and d2R scores, of the HADS-Anxiety scale, of the BDI test, and of the ISI and PCL-5 scores can be found in Supp Table 1.

<sup>d</sup> Ninety-one patients who completed the in-person assessment had a different trigger for the visit.

Supplementary figure 1. Visualization of symptoms\* and their overlap presented by the 192 patients\*\* (out of 478 patients) who presented at least one symptom at teleconsultation

\* Symptoms which did not exist before COVID-19.

\*\* Fifty-two patients had a new symptom that was not dyspnea, cognitive symptom, or neurological symptom.

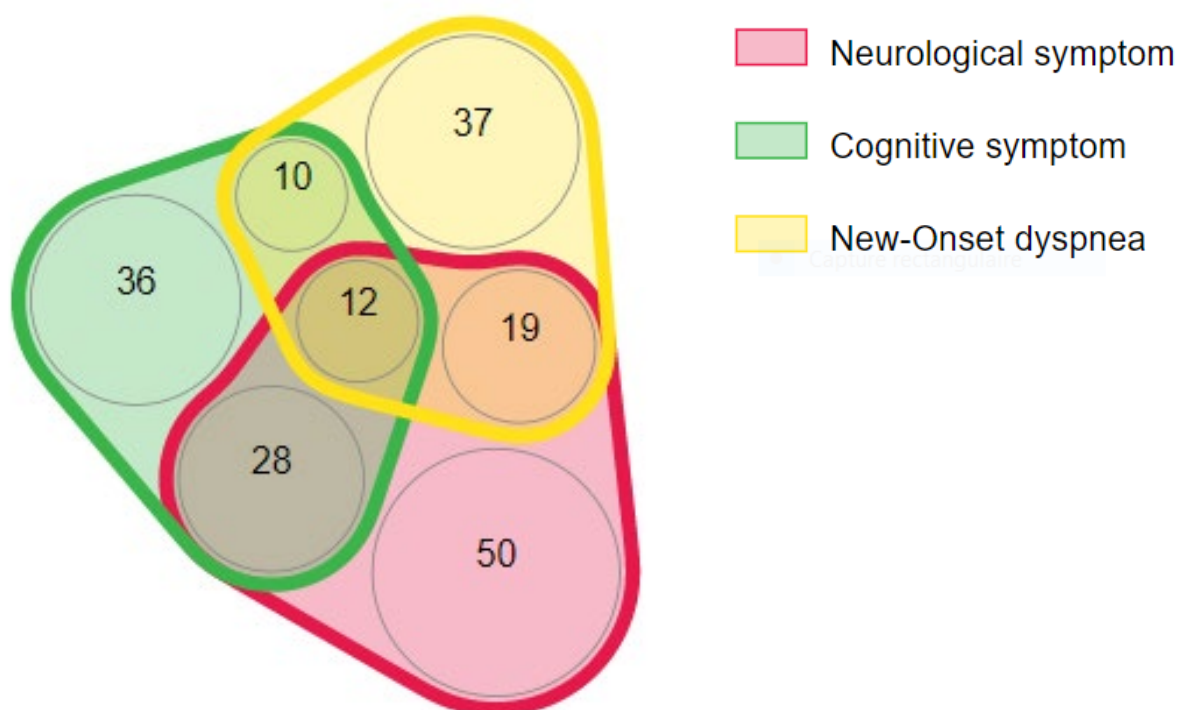

Supplementary figure 2. Results of the 36-item Short-Form Health Survey (SF-36) and Multidimensional Fatigue Inventory (MFI-20 scale) scores of the patients admitted to the outpatient clinic

- A. In all patients who completed the questionnaires (n=130 for SF-36 and n=145 for MFI-20)
- B. In patients who had been hospitalized in intensive care unit (ICU, red line, n=68 for SF36 and n=75 for MFI20) or not (non-ICU blue line, n=62 for SF-36 and n=70 for MFI-20).
- C. . In patients who had been intubated (red line, n=36 for SF-36 and n=37 for MFI-20) or not (blue line, n=94 for SF-36 and n=108 for MFI-20)
- D. In patients who received vasopressors (red line, n=36 for SF-36 and n=37 for MFI-20) or not (blue line, n=94 for SF-36 and n=108 for MFI-20)
- E. In patients who underwent ECMO (red line, n=6 for SF-36 and n=7 for MFI20) or not (blue line, n=124 for SF-36 and n=138 for MFI-20).

The MFI20 questionnaire evaluates four domains: "general fatigue", "reduced activity", "motivation" and "mental fatigue". Each subscale ranges from 1 to 5, corresponding to the best and worst feeling due to fatigue for each domain, respectively.<sup>10</sup>

The SF36 questionnaire evaluates 8 domains: "physical functioning", "role limitations due to physical health", "role limitations due to emotional problems", "energy/fatigue", "emotional well-being", "social functioning", "pain" and "general health". Each subscale ranges from 0 to 100, corresponding to the worst and best health state, respectively<sup>9</sup>.

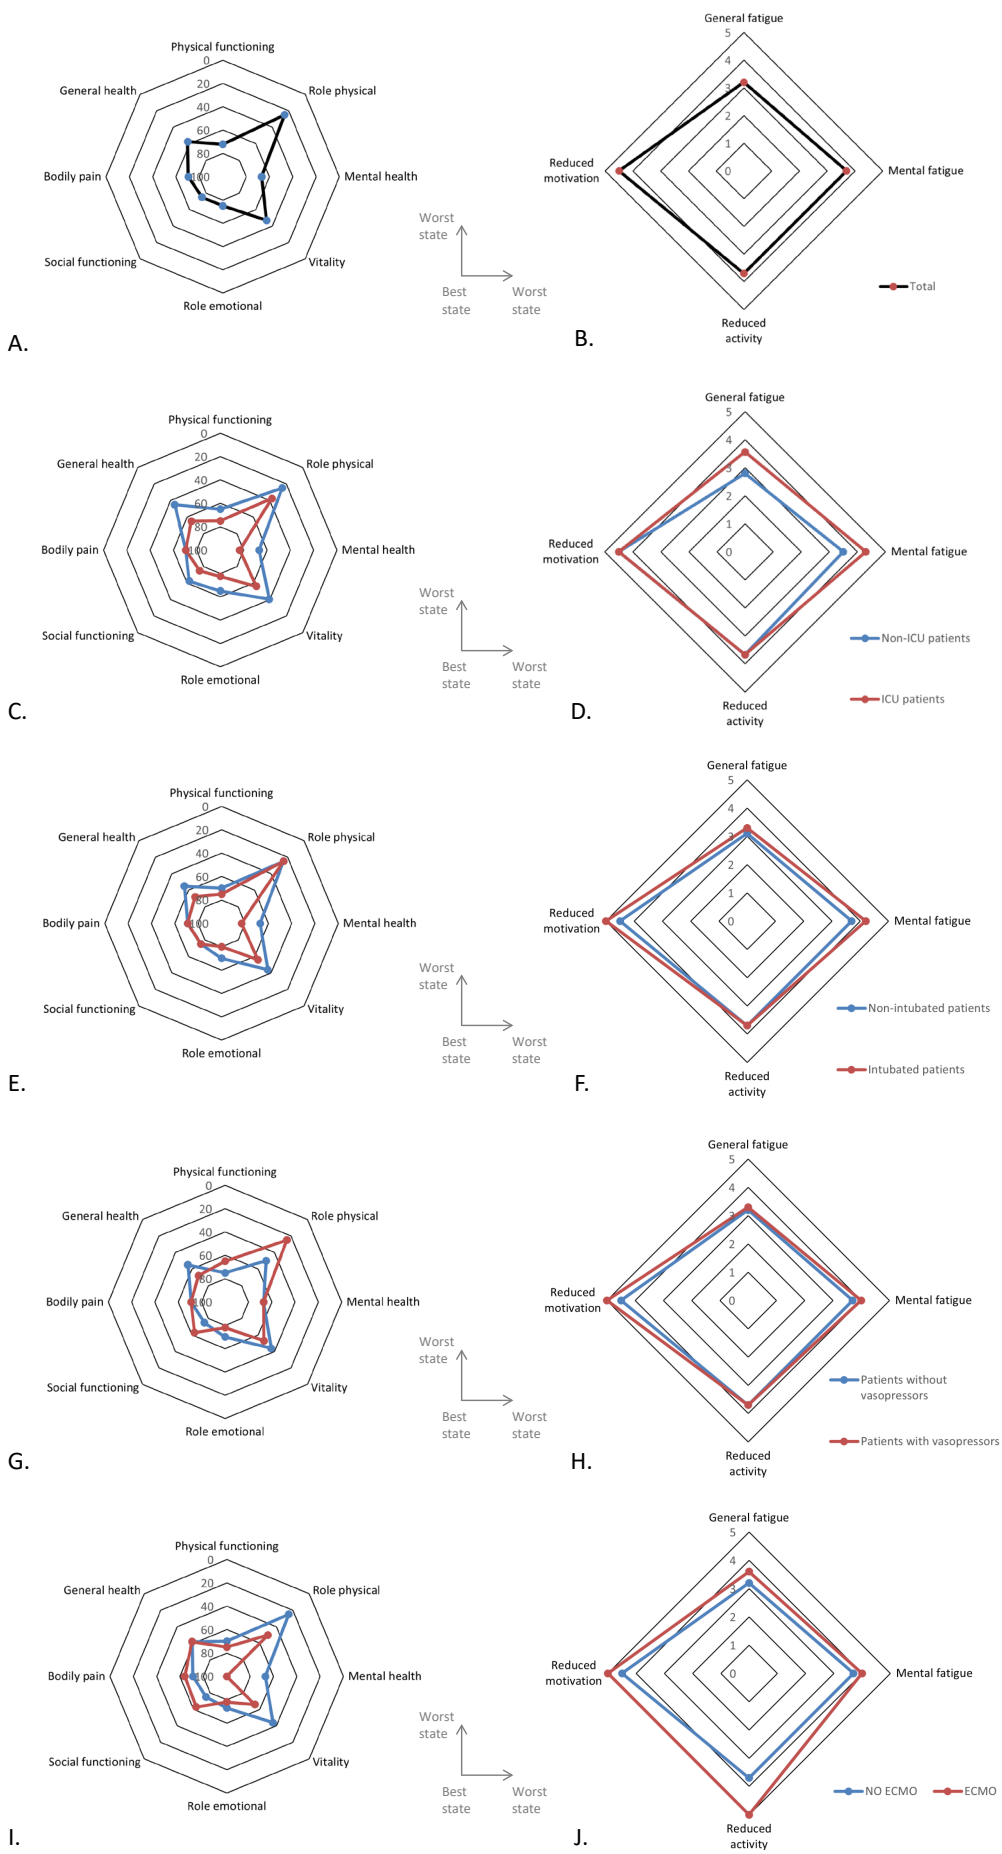

Supplementary figure 3. Anti-SARS-CoV-2 serological index of the patients admitted to the outpatient clinic

- Panel A: depending on whether patients had been intubated or not during the initial hospitalization
- Panel B: depending on the immunocompromised status
- Panel C: depending on whether patients had been hospitalized in an intensive care unit (ICU) during the initial hospitalization.

(HIV: human immunodeficiency virus, ICU: intensive care unit).

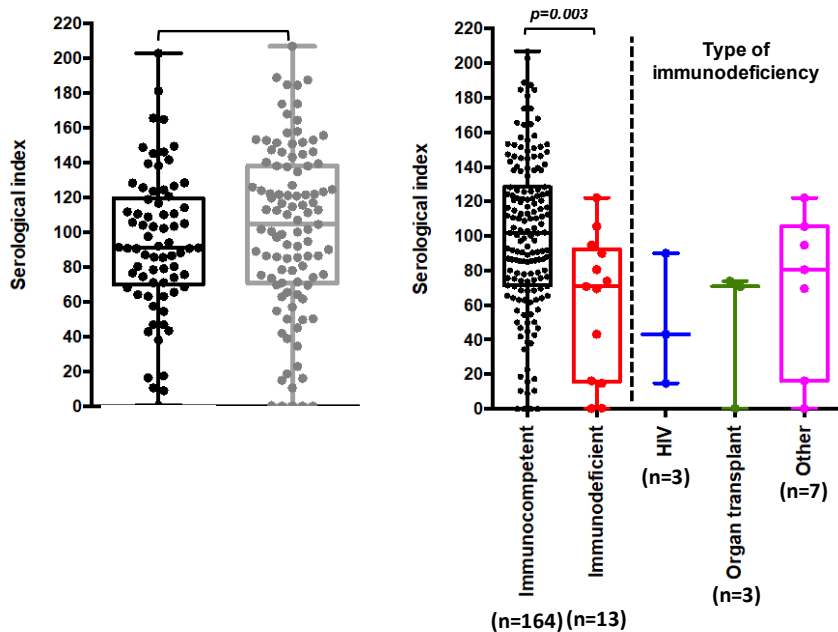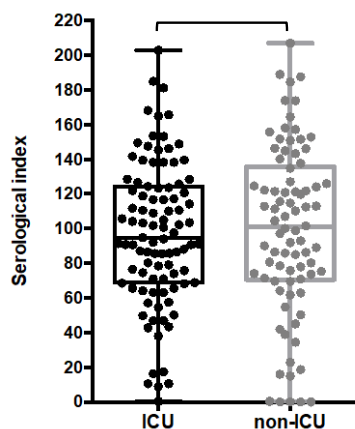

## References

1. Graham BL, Steenbruggen I, Miller MR, et al. Standardization of Spirometry 2019 Update. An Official American Thoracic Society and European Respiratory Society Technical Statement. *American journal of respiratory and critical care medicine*. 2019;200(8):e70-e88.
2. Wanger J, Clausen JL, Coates A, et al. Standardisation of the measurement of lung volumes. *The European respiratory journal*. 2005;26(3):511-522.
3. Graham BL, Brusasco V, Burgos F, et al. 2017 ERS/ATS standards for single-breath carbon monoxide uptake in the lung. *Eur Respir J*. 2017;49(1).
4. Quanjer PH, Stanojevic S, Cole TJ, et al. Multi-ethnic reference values for spirometry for the 3-95-yr age range: the global lung function 2012 equations. *The European respiratory journal*. 2012;40(6):1324-1343.
5. Cotes JE, Chinn DJ, Quanjer PH, Roca J, Yernault JC. Standardization of the measurement of transfer factor (diffusing capacity). *The European respiratory journal*. 1993;6 Suppl 16:41-52.
6. Lewis RA, Howell JB. Definition of the hyperventilation syndrome. *Bull Eur Physiopathol Respir*. 1986;22(2):201-205.
7. Boulding R, Stacey R, Niven R, Fowler SJ. Dysfunctional breathing: a review of the literature and proposal for classification. *Eur Respir Rev*. 2016;25(141):287-294.
8. Metral M, Nadin I, Locatelli I, et al. How helpful are the European AIDS Clinical Society cognitive screening questions in predicting cognitive impairment in an aging, well-treated HIV-positive population? *HIV Med*. 2020;21(5):342-348.
9. Ware JE, Jr., Sherbourne CD. The MOS 36-item short-form health survey (SF-36). I. Conceptual framework and item selection. *Med Care*. 1992;30(6):473-483.
10. Gentile S, Delarozziere JC, Favre F, Sambuc R, San Marco JL. Validation of the French 'multidimensional fatigue inventory' (MFI 20). *Eur J Cancer Care (Engl)*. 2003;12(1):58-64.
11. Aalto AM, Elovainio M, Kivimaki M, Uutela A, Pirkola S. The Beck Depression Inventory and General Health Questionnaire as measures of depression in the general population: a validation study using the Composite International Diagnostic Interview as the gold standard. *Psychiatry Res*. 2012;197(1-2):163-171.
12. Spinhoven P, Ormel J, Sloekers PP, Kempen GI, Speckens AE, Van Hemert AM. A validation study of the Hospital Anxiety and Depression Scale (HADS) in different groups of Dutch subjects. *Psychol Med*. 1997;27(2):363-370.
13. Blevins CA, Weathers FW, Davis MT, Witte TK, Domino JL. The Posttraumatic Stress Disorder Checklist for DSM-5 (PCL-5): Development and Initial Psychometric Evaluation. *J Trauma Stress*. 2015;28(6):489-498.
14. Bastien CH, Vallieres A, Morin CM. Validation of the Insomnia Severity Index as an outcome measure for insomnia research. *Sleep Med*. 2001;2(4):297-307.
15. Nasreddine ZS, Patel BB. Validation of Montreal Cognitive Assessment, MoCA, Alternate French Versions. *Can J Neurol Sci*. 2016;43(5):665-671.
16. Poitrenaud J, Kalafat M, Israel L, Guez D. [A critical review of available tools for evaluating memory enhancers in Alzheimer's disease]. *Rev Med Interne*. 1997;18(1):59-71.
17. Brickenkamp R, Schmidt-Atzert L, Liepmann D. *Aufmerksamkeits- und Konzentrationstest*. 2010.

## 1 Collaborators

- 2 1. Dr. Antoine BALDACCI, Université Paris-Saclay, AP-HP, Service de psychiatrie, Hôpital de Bicêtre, DMU 11 psychiatrie, santé mentale,  
3 addictologie et nutrition, équipe MOODS, INSERM U1178, CESP (Centre de Recherche en Epidémiologie et Santé des Populations), Le  
4 Kremlin-Bicêtre, France
- 5 2. Dr. Maryne BALLERINI, Université Paris-Saclay, AP-HP, Service de psychiatrie, Hôpital de Bicêtre, DMU 11 psychiatrie, santé mentale,  
6 addictologie et nutrition, équipe MOODS, INSERM U1178, CESP (Centre de Recherche en Epidémiologie et Santé des Populations), Le  
7 Kremlin-Bicêtre, France
- 8 3. Dr. Aurore BOUGAREL, Université Paris-Saclay, AP-HP, Service de psychiatrie, Hôpital de Bicêtre, DMU 11 psychiatrie, santé mentale,  
9 addictologie et nutrition, équipe MOODS, INSERM U1178, CESP (Centre de Recherche en Epidémiologie et Santé des Populations), Le  
10 Kremlin-Bicêtre, France
- 11 4. Dr. Theo FAULET, Université Paris-Saclay, AP-HP, Service de psychiatrie, Hôpital de Bicêtre, DMU 11 psychiatrie, santé mentale,  
12 addictologie et nutrition, équipe MOODS, INSERM U1178, CESP (Centre de Recherche en Epidémiologie et Santé des Populations), Le  
13 Kremlin-Bicêtre, France
- 14 5. Dr. Christian KONDARJIAN, Université Paris-Saclay, AP-HP, Service de psychiatrie, Hôpital de Bicêtre, DMU 11 psychiatrie, santé mentale,  
15 addictologie et nutrition, équipe MOODS, INSERM U1018, CESP (Centre de Recherche en Epidémiologie et Santé des Populations), Le  
16 Kremlin-Bicêtre, France
- 17 6. Dr. Paul THOREY, Université Paris-Saclay, AP-HP, Service de psychiatrie, Hôpital de Bicêtre, DMU 11 psychiatrie, santé mentale,  
18 addictologie et nutrition, équipe MOODS, INSERM U1018, CESP (Centre de Recherche en Epidémiologie et Santé des Populations), Le  
19 Kremlin-Bicêtre, France
- 20 7. Prof. Jacques DURANTEAU, Université Paris-Saclay, AP-HP, Service de réanimation chirurgicale, Hôpital de Bicêtre, DMU 12 Anesthésie,  
21 réanimation, douleur, Le Kremlin-Bicêtre, France
- 22 8. Dr. Marie WERNER, Université Paris-Saclay, AP-HP, Service de réanimation chirurgicale, Hôpital de Bicêtre, DMU 12 Anesthésie,  
23 réanimation, douleur, Le Kremlin-Bicêtre, France
- 24 9. Dr. Benjamin BERGIS, Université Paris-Saclay, AP-HP, Service de réanimation chirurgicale, Hôpital de Bicêtre, DMU 12 Anesthésie,  
25 réanimation, douleur, Le Kremlin-Bicêtre, France
- 26 10. Dr. Pierre-Antoine OILLIC, Université Paris-Saclay, AP-HP, Service de réanimation chirurgicale, Hôpital de Bicêtre, DMU 12 Anesthésie,  
27 réanimation, douleur, Le Kremlin-Bicêtre, France
- 28 11. Dr. Christian LAPLACE, Université Paris-Saclay, AP-HP, Service de réanimation chirurgicale, Hôpital de Bicêtre, DMU 12 Anesthésie,  
29 réanimation, douleur, Le Kremlin-Bicêtre, France
- 30 12. Dr. Marie-Josée CABALLERO, Université Paris-Saclay, AP-HP, Service de réanimation chirurgicale, Hôpital de Bicêtre, DMU 12 Anesthésie,  
31 réanimation, douleur, Le Kremlin-Bicêtre, France
- 32 13. Dr. Bernard VIGUE, Université Paris-Saclay, AP-HP, Service de réanimation chirurgicale, Hôpital de Bicêtre, DMU 12 Anesthésie,  
33 réanimation, douleur, Le Kremlin-Bicêtre, France
- 34 14. Dr. Pierre-Etienne LEBLANC, Université Paris-Saclay, AP-HP, Service de réanimation chirurgicale, Hôpital de Bicêtre, DMU 12 Anesthésie,  
35 réanimation, douleur, Le Kremlin-Bicêtre, France
- 36 15. Dr. Guillaume DUBREUIL, Université Paris-Saclay, AP-HP, Service de réanimation chirurgicale, Hôpital de Bicêtre, DMU 12 Anesthésie,  
37 réanimation, douleur, Le Kremlin-Bicêtre, France
- 38 16. Dr. Jonas POCHARD, Université Paris-Saclay, AP-HP, Service de réanimation chirurgicale, Hôpital de Bicêtre, DMU 12 Anesthésie,  
39 réanimation, douleur, Le Kremlin-Bicêtre, France
- 40 17. Dr. Gaëlle CHEISSON, Université Paris-Saclay, AP-HP, Service de réanimation chirurgicale, Hôpital de Bicêtre, DMU 12 Anesthésie,  
41 réanimation, douleur, Le Kremlin-Bicêtre, France
- 42 18. Dr. Lucille WILDENBERG, Université Paris-Saclay, AP-HP, Service de réanimation chirurgicale, Hôpital de Bicêtre, DMU 12 Anesthésie,  
43 réanimation, douleur, Le Kremlin-Bicêtre, France
- 44 19. Dr. Aurore RODRIGUES, Université Paris-Saclay, AP-HP, Service de réanimation chirurgicale, Hôpital de Bicêtre, DMU 12 Anesthésie,  
45 réanimation, douleur, Le Kremlin-Bicêtre, France
- 46 20. Dr. Zina BOUZIT, Université Paris-Saclay, AP-HP, Service de réanimation chirurgicale, Hôpital de Bicêtre, DMU 12 Anesthésie,  
47 réanimation, douleur, Le Kremlin-Bicêtre, France
- 48 21. Dr. Claire MENGELLE, Université Paris-Saclay, AP-HP, Service de réanimation chirurgicale, Hôpital de Bicêtre, DMU 12 Anesthésie,  
49 réanimation, douleur, Le Kremlin-Bicêtre, France
- 50 22. Dr. Antonia BLANIE, Université Paris-Saclay, AP-HP, Service de réanimation chirurgicale, Hôpital de Bicêtre, DMU 12 Anesthésie,  
51 réanimation, douleur, Le Kremlin-Bicêtre, France
- 52 23. Dr. Karl KAMEL, Université Paris-Saclay, AP-HP, Service de réanimation chirurgicale, Hôpital de Bicêtre, DMU 12 Anesthésie, réanimation,  
53 douleur, Le Kremlin-Bicêtre, France
- 54 24. Dr. Manon SEGURET, Université Paris-Saclay, AP-HP, Service de réanimation chirurgicale, Hôpital de Bicêtre, DMU 12 Anesthésie,  
55 réanimation, douleur, Le Kremlin-Bicêtre, France
- 56 25. Dr. Laurent MARTIN, Université Paris-Saclay, AP-HP, Service de réanimation chirurgicale, Hôpital de Bicêtre, DMU 12 Anesthésie,  
57 réanimation, douleur, Le Kremlin-Bicêtre, France



- 58  
59 26. Dr. Jacques de MONTBLANC, Université Paris-Saclay, AP-HP, Service de réanimation chirurgicale, Hôpital de Bicêtre, DMU 12 Anesthésie, réanimation, douleur, Le Kremlin-Bicêtre, France
- 60  
61 27. Dr. Laurent AUBERT, Université Paris-Saclay, AP-HP, Service de réanimation chirurgicale, Hôpital de Bicêtre, DMU 12 Anesthésie, réanimation, douleur, Le Kremlin-Bicêtre, France
- 62  
63 28. Dr. Christine FESSEMMEYER, Université Paris-Saclay, AP-HP, Service de réanimation chirurgicale, Hôpital de Bicêtre, DMU 12 Anesthésie, réanimation, douleur, Le Kremlin-Bicêtre, France
- 64  
65 29. Dr. Antoine BAUMAN, Université Paris-Saclay, AP-HP, Service de réanimation chirurgicale, Hôpital de Bicêtre, DMU 12 Anesthésie, réanimation, douleur, Le Kremlin-Bicêtre, France
- 66  
67 30. Dr. Mostafa MAZBOUDI, Université Paris-Saclay, AP-HP, Service de réanimation chirurgicale, Hôpital de Bicêtre, DMU 12 Anesthésie, réanimation, douleur, Le Kremlin-Bicêtre, France
- 68  
69 31. Dr. Yannis BORNEMANN, Université Paris-Saclay, AP-HP, Service de réanimation chirurgicale, Hôpital de Bicêtre, DMU 12 Anesthésie, réanimation, douleur, Le Kremlin-Bicêtre, France
- 70  
71 32. Dr. Virginie TARAZONA, Université Paris-Saclay, AP-HP, Service de réanimation chirurgicale, Hôpital de Bicêtre, DMU 12 Anesthésie, réanimation, douleur, Le Kremlin-Bicêtre, France
- 72  
73 33. Dr. Faiza MALEK, Université Paris-Saclay, AP-HP, Service de réanimation chirurgicale, Hôpital de Bicêtre, DMU 12 Anesthésie, réanimation, douleur, Le Kremlin-Bicêtre, France
- 74  
75 34. Dr. Anne-Claire de CROUY, Université Paris-Saclay, AP-HP, Service de réanimation chirurgicale, Hôpital de Bicêtre, DMU 12 Anesthésie, réanimation, douleur, Le Kremlin-Bicêtre, France
- 76  
77 35. Dr. Marie BRUYERE, Université Paris-Saclay, AP-HP, Service de réanimation chirurgicale, Hôpital de Bicêtre, DMU 12 Anesthésie, réanimation, douleur, Le Kremlin-Bicêtre, France
- 78  
79 36. Dr. Catherine BAUJARD, Université Paris-Saclay, AP-HP, Service de réanimation chirurgicale, Hôpital de Bicêtre, DMU 12 Anesthésie, réanimation, douleur, Le Kremlin-Bicêtre, France
- 80  
81 37. Mrs. Caroline BOYER, Université Paris-Saclay, AP-HP, Service de gynécologie-obstétrique maternité, Hôpital de Bicêtre, DMU 2 Santé des femmes et des nouveaux nés, Le Kremlin-Bicêtre, France
- 82  
83 38. Mrs. Alessandra CONTI, Université Paris-Saclay, AP-HP, Service de gynécologie-obstétrique maternité, Hôpital de Bicêtre, DMU 2 Santé des femmes et des nouveaux nés, Le Kremlin-Bicêtre, France
- 84  
85 39. Mrs. Anne ELBAZ, Université Paris-Saclay, AP-HP, Service de neurochirurgie, Hôpital de Bicêtre, DMU 9 Neurosciences, Le Kremlin-Bicêtre, France
- 86  
87 40. Mrs. Laurence GEFROY, Université Paris-Saclay, AP-HP, Service de gastro-entérologie, Hôpital de Bicêtre, DMU 6 Maladies et oncologie digestive- nutrition- transplantations, Le Kremlin-Bicêtre, France
- 88  
89 41. Mrs. Isabelle HARDY-LÉGER, Université Paris-Saclay, APHP, Service de médecine interne et immunologie clinique, Hôpital de Bicêtre, DMU7 Endocrinologie-immunités-inflammations-cancer-urgences, Le Kremlin-Bicêtre, France
- 90  
91 42. Mrs. Ivana KOSIC, Université Paris-Saclay, AP-HP, unité de suites et de réadaptation, Hôpital de Bicêtre, DMU7 Endocrinologie-immunités-inflammations-cancer-urgences, Le Kremlin-Bicêtre, France
- 92  
93 43. Mrs. Cécilia ORBLIN-BEDOS, Université Paris-Saclay, AP-HP, Service de néphrologie transplantation, Hôpital de Bicêtre, DMU 4 CORREVE, Maladies du Cœur et des Vaisseaux, Le Kremlin-Bicêtre, France
- 94  
95  
96 44. Mrs. Claire PARISOT, Université Paris-Saclay, AP-HP, Service de rééducation neurologique infantile, Hôpital de Bicêtre, DMU 3 Santé de l'enfant et de l'adolescent, Équipe "Psychiatrie du développement", INSERM U1018, CESP (Centre de Recherche en Epidémiologie et Santé des Populations), Le Kremlin-Bicêtre, France
- 97  
98  
99 45. Mrs. Julie VIGNERAS, Université Paris-Saclay, AP-HP, Service de rééducation neurologique infantile, Hôpital de Bicêtre, DMU 3 Santé de l'enfant et de l'adolescent, Équipe "Psychiatrie du développement", INSERM U1018, CESP (Centre de Recherche en Epidémiologie et Santé des Populations), Le Kremlin-Bicêtre, France
- 100  
101 46. Mr. François RADIGUER, Université Paris-Saclay, AP-HP, Service de réanimation chirurgicale, Hôpital de Bicêtre, DMU 12 Anesthésie, réanimation, douleur, Le Kremlin-Bicêtre, France
- 102  
103 47. Mrs. Louise RECHTMAN, Université Paris-Saclay, AP-HP, Service de réanimation pédiatrique et médecine néonatale. DMU 3 Santé de l'enfant et de l'adolescent, Le Kremlin-Bicêtre, France
- 104  
105 48. Mrs. Marine SOUCIN, Université Paris-Saclay, AP-HP, Equipe de liaison et soins en addictologie, Hôpital de Bicêtre, DMU 11 Psychiatrie, santé mentale, addictologie et nutrition, Le Kremlin-Bicêtre, France
- 106  
107 49. Mrs. Yael STORCH, Université Paris-Saclay, AP-HP, service de pneumologie, Hôpital de Bicêtre, DMU 5 Thorinno, Le Kremlin-Bicêtre, France
- 108  
109 50. Mrs. Sabine SPORTOUCH, Université Paris-Saclay, AP-HP, service de médecine intensive-réanimation, hôpital de Bicêtre, DMU CORREVE Maladies du cœur et des vaisseaux, Le Kremlin-Bicêtre, France
- 110  
111 51. Mrs. Leslie TCHETCHENIGBO, Université Paris-Saclay, AP-HP, Service de psychiatrie, Hôpital de Bicêtre, DMU 11 psychiatrie, santé mentale, addictologie et nutrition, équipe MOODS, Le Kremlin-Bicêtre, France
- 112  
113 52. Mrs. Mylène YAM, Université Paris-Saclay, Service de neurophysiologie clinique et épileptologie, Hôpital de Bicêtre, DMU 9 Neurosciences, Le Kremlin-Bicêtre, France
- 114  
115 53. Prof. Pierre TISSIERES, Université Paris-Saclay, AP-HP, Service de réanimation pédiatrique et médecine néonatale, Hôpital de Bicêtre, DMU 3 Santé de l'enfant et de l'adolescent, Institute of Integrative Biology of the Cell, CNRS, CEA, Le Kremlin-Bicêtre, France

- 116 54. Dr. Clémence MARAIS, Université Paris-Saclay, AP-HP, Service de réanimation pédiatrique et médecine néonatale, Hôpital de Bicêtre,  
117 DMU 3 Santé de l'enfant et de l'adolescent, Le Kremlin-Bicêtre, France
- 118 55. Dr. Caroline CLAUDE, Université Paris-Saclay, AP-HP, Service de réanimation pédiatrique et médecine néonatale, Hôpital de Bicêtre,  
119 DMU 3 Santé de l'enfant et de l'adolescent, Le Kremlin-Bicêtre, France
- 120 56. Dr. Nada SEMAAN, Université Paris-Saclay, AP-HP, Service de réanimation pédiatrique et médecine néonatale, Hôpital de Bicêtre, DMU  
121 3 Santé de l'enfant et de l'adolescent, Le Kremlin-Bicêtre, France
- 122 57. Dr. Ramy CHARBEL, Université Paris-Saclay, AP-HP, Service de réanimation pédiatrique et médecine néonatale, Hôpital de Bicêtre, DMU  
123 3 Santé de l'enfant et de l'adolescent, Le Kremlin-Bicêtre, France
- 124 58. Dr. Narjess GHALI, Université Paris-Saclay, AP-HP, Service de réanimation pédiatrique et médecine néonatale, Hôpital de Bicêtre, DMU  
125 3 Santé de l'enfant et de l'adolescent, Le Kremlin-Bicêtre, France
- 126 59. Dr. Vladimir COUSIN, Université Paris-Saclay, AP-HP, Service de réanimation pédiatrique et médecine néonatale, Hôpital de Bicêtre, DMU  
127 3 Santé de l'enfant et de l'adolescent, Le Kremlin-Bicêtre, France
- 128 60. Dr. Quitterie LAUDOUDARD, Université Paris-Saclay, AP-HP, Service de réanimation pédiatrique et médecine néonatale, Hôpital de Bicêtre,  
129 DMU 3 Santé de l'enfant et de l'adolescent, Le Kremlin-Bicêtre, France
- 130 61. Dr. Simon BARREAU, Université Paris-Saclay, AP-HP, Service de réanimation pédiatrique et médecine néonatale, Hôpital de Bicêtre,  
131 DMU 3 Santé de l'enfant et de l'adolescent, Le Kremlin-Bicêtre, France
- 132 62. Dr. Brendan TRAVERT, Université Paris-Saclay, AP-HP, Service de réanimation pédiatrique et médecine néonatale, Hôpital de Bicêtre,  
133 DMU 3 Santé de l'enfant et de l'adolescent, Le Kremlin-Bicêtre, France
- 134 63. Dr. Jean-Eudes PILOQUET, Université Paris-Saclay, AP-HP, Service de réanimation pédiatrique et médecine néonatale, Hôpital de Bicêtre,  
135 DMU 3 Santé de l'enfant et de l'adolescent, Le Kremlin-Bicêtre, France
- 136 64. Dr. Zoé DEMAILLY, Université Paris-Saclay, AP-HP, Service de médecine intensive-réanimation, hôpital de Bicêtre, DMU 4 CORREVE  
137 Maladies du cœur et des vaisseaux, Inserm UMR\_S999, Le Kremlin-Bicêtre, France
- 138 65. Dr. Zied MERCHAOUI, Université Paris-Saclay, AP-HP, Service de réanimation pédiatrique et médecine néonatale, Hôpital de Bicêtre,  
139 DMU 3 Santé de l'enfant et de l'adolescent, Le Kremlin-Bicêtre, France
- 140 66. Dr. Philippe DURAND, Université Paris-Saclay, AP-HP, Service de réanimation pédiatrique et médecine néonatale, Hôpital de Bicêtre,  
141 DMU 3 Santé de l'enfant et de l'adolescent, Le Kremlin-Bicêtre, France
- 142 67. Dr. Jordi MIATELLO, Université Paris-Saclay, AP-HP, Service de réanimation pédiatrique et médecine néonatale, Hôpital de Bicêtre, DMU  
143 3 Santé de l'enfant et de l'adolescent, Le Kremlin-Bicêtre, France
- 144 68. Prof. Christian RICHARD, Université Paris-Saclay, AP-HP, Service de médecine intensive-réanimation, hôpital de Bicêtre, DMU 4 CORREVE  
145 Maladies du cœur et des vaisseaux, Inserm UMR\_S999, Le Kremlin-Bicêtre, France
- 146 69. Prof. Jean-Louis TEBOUL, Université Paris-Saclay, AP-HP, service de médecine intensive-réanimation, hôpital de Bicêtre, DMU CORREVE  
147 Maladies du cœur et des vaisseaux, Inserm UMR\_S999, Le Kremlin-Bicêtre, France
- 148 70. Dr. Nadia ANGUEL, Université Paris-Saclay, AP-HP, Service de médecine intensive-réanimation, hôpital de Bicêtre, DMU CORREVE  
149 Maladies du cœur et des vaisseaux, Inserm UMR\_S999, Le Kremlin-Bicêtre, France
- 150 71. Dr. David OSMAN, Université Paris-Saclay, AP-HP, Service de médecine intensive-réanimation, hôpital de Bicêtre, DMU 4 CORREVE  
151 Maladies du cœur et des vaisseaux, Inserm UMR\_S999, Le Kremlin-Bicêtre, France
- 152 72. Dr. Laurent GUERIN, Université Paris-Saclay, AP-HP, Service de médecine intensive-réanimation, hôpital de Bicêtre, DMU 4 CORREVE  
153 Maladies du cœur et des vaisseaux, Inserm UMR\_S999, Le Kremlin-Bicêtre, France
- 154 73. Dr. Soufia AYED, Université Paris-Saclay, AP-HP, Service de médecine intensive-réanimation, hôpital de Bicêtre, DMU 4 CORREVE  
155 Maladies du cœur et des vaisseaux, Inserm UMR\_S999, Le Kremlin-Bicêtre, France
- 156 74. Dr. Arthur PAVOT, Université Paris-Saclay, AP-HP, Service de médecine intensive-réanimation, hôpital de Bicêtre, DMU 4 CORREVE  
157 Maladies du cœur et des vaisseaux, Inserm UMR\_S999, Le Kremlin-Bicêtre, France
- 158 75. Dr. Astrid BERTIER, Université Paris-Saclay, AP-HP, Service de médecine intensive-réanimation, hôpital de Bicêtre, DMU 4 CORREVE  
159 Maladies du cœur et des vaisseaux, Inserm UMR\_S999, Le Kremlin-Bicêtre, France
- 160 76. Dr. Thibault CREUTIN, Université Paris-Saclay, AP-HP, Service de médecine intensive-réanimation, hôpital de Bicêtre, DMU 4 CORREVE  
161 Maladies du cœur et des vaisseaux, Inserm UMR\_S999, Le Kremlin-Bicêtre, France
- 162 77. Dr. Christopher LAI, Université Paris-Saclay, AP-HP, Service de médecine intensive-réanimation, hôpital de Bicêtre, DMU 4 CORREVE  
163 Maladies du cœur et des vaisseaux, Inserm UMR\_S999, Le Kremlin-Bicêtre, France
- 164 78. Dr. Pierre de NORMANDIE, Université Paris-Saclay, AP-HP, Service de médecine intensive-réanimation, hôpital de Bicêtre, DMU 4  
165 CORREVE Maladies du cœur et des vaisseaux, Inserm UMR\_S999, Le Kremlin-Bicêtre, France
- 166 79. Dr. Benoît GILLE, Université Paris-Saclay, AP-HP, Service de médecine intensive-réanimation, hôpital de Bicêtre, DMU 4 CORREVE  
167 Maladies du cœur et des vaisseaux, Inserm UMR\_S999, Le Kremlin-Bicêtre, France
- 168 80. Dr. Anne GRUNENWALD, Université Paris-Saclay, AP-HP, Service de médecine intensive-réanimation, hôpital de Bicêtre, DMU 4 CORREVE  
169 Maladies du cœur et des vaisseaux, Inserm UMR\_S999, Le Kremlin-Bicêtre, France
- 170 81. Prof. Anne-Marie ROQUE-AFONSO, Université Paris-Saclay, AP-HP, Service de virologie, Hôpital Paul Brousse, DMU 15 Biologie-  
171 Génétique-PUI, INSERM 1193, Villejuif, France

- 172  
173 82. Dr. Coralie PALLIER, Université Paris-Saclay, AP-HP, Service de virologie, Hôpital Paul Brousse, DMU 15 Biologie-Génétique-PUI, INSERM 1193, Villejuif, France
- 174  
175 83. Dr. Christelle VAULOUP-FELLOUS, Université Paris-Saclay, AP-HP, Service de virologie, Hôpital Paul Brousse, DMU 15 Biologie-Génétique-PUI, INSERM 1193, Villejuif, France
- 176  
177 84. Dr. Lina MOUNA, Université Paris-Saclay, AP-HP, Service de virologie, Hôpital Paul Brousse, DMU 15 Biologie-Génétique-PUI, INSERM 1193, Villejuif, France
- 178  
179 85. Dr. Honorine FENAUX, Université Paris-Saclay, AP-HP, Service de virologie, Hôpital Paul Brousse, DMU 15 Biologie-Génétique-PUI, INSERM 1193, Villejuif, France
- 180  
181 86. Dr. Nicolas FORTINEAU, Université Paris-Saclay, AP-HP, Service de microbiologie, Hôpital de Bicêtre, DMU 15 Biologie-Génétique-PUI, INSERM 1193, Le Kremlin-Bicêtre, France
- 182  
183 87. Dr. Cécile EMERAUD, Université Paris-Saclay, AP-HP, Service de microbiologie, Hôpital de Bicêtre, DMU 15 Biologie-Génétique-PUI, INSERM 1193, Le Kremlin-Bicêtre, France
- 184  
185 88. Dr. Mona KHECHAREM, Université Paris-Saclay, AP-HP, Service de microbiologie, Hôpital de Bicêtre, DMU 15 Biologie-Génétique-PUI, INSERM 1193, Le Kremlin-Bicêtre, France
- 186  
187 89. Dr. Souad OUZANI, Université Paris-Saclay, AP-HP, Service de microbiologie, Hôpital de Bicêtre, DMU 15 Biologie-Génétique-PUI, INSERM 1193, Le Kremlin-Bicêtre, France
- 188  
189 90. Dr. Gaëlle CUZON, Université Paris-Saclay, AP-HP, Service de microbiologie, Hôpital de Bicêtre, DMU 15 Biologie-Génétique-PUI, INSERM 1193, Le Kremlin-Bicêtre, France
- 190  
191 91. Dr. Samer SOLIMAN, Université Paris-Saclay, AP-HP, Service de radiologie diagnostique et interventionnelle, Hôpital de Bicêtre, DMU 14 Smart Imaging, BioMaps, Le Kremlin-Bicêtre, France
- 192  
193 92. Dr. Hugo GORTAIS, Université Paris-Saclay, AP-HP, Service de radiologie diagnostique et interventionnelle, Hôpital de Bicêtre, DMU 14 Smart Imaging, BioMaps, Le Kremlin-Bicêtre, France
- 194  
195 93. Dr. Florian MAXWELL, Université Paris-Saclay, AP-HP, Service de radiologie diagnostique et interventionnelle, Hôpital de Bicêtre, DMU 14 Smart Imaging, BioMaps, Le Kremlin-Bicêtre, France
- 196  
197 94. Dr. Alexia SAVIGNAC, Université Paris-Saclay, AP-HP, Service de radiologie diagnostique et interventionnelle, Hôpital de Bicêtre, DMU 14 Smart Imaging, BioMaps, Le Kremlin-Bicêtre, France
- 198  
199 95. Dr. Matthieu DEVILDER, Université Paris-Saclay, AP-HP, Service de radiologie diagnostique et interventionnelle, Hôpital de Bicêtre, DMU 14 Smart Imaging, BioMaps, Le Kremlin-Bicêtre, France
- 200  
201 96. Dr. Miryam MOUSSA, Université Paris-Saclay, AP-HP, Service de radiologie diagnostique et interventionnelle, Hôpital de Bicêtre, DMU 14 Smart Imaging, BioMaps, Le Kremlin-Bicêtre, France
- 202  
203 97. Dr. Alfredo CANTARINHA, Université Paris-Saclay, AP-HP, Service de radiologie diagnostique et interventionnelle, Hôpital de Bicêtre, DMU 14 Smart Imaging, BioMaps, Le Kremlin-Bicêtre, France
- 204  
205 98. Dr. Alain ABDO, Université Paris-Saclay, AP-HP, Service de radiologie diagnostique et interventionnelle, Hôpital de Bicêtre, DMU 14 Smart Imaging, BioMaps, Le Kremlin-Bicêtre, France
- 206  
207 99. Dr. Roberta RUSSO, Université Paris-Saclay, AP-HP, Service de radiologie diagnostique et interventionnelle, Hôpital de Bicêtre, DMU 14 Smart Imaging, BioMaps, Le Kremlin-Bicêtre, France
- 208  
209 100. Dr. Guillaume CLUZEL, Université Paris-Saclay, AP-HP, Service de radiologie diagnostique et interventionnelle, Hôpital de Bicêtre, DMU 14 Smart Imaging, BioMaps, Le Kremlin-Bicêtre, France
- 210  
211 101. Dr. Mathilde GAYET, Université Paris-Saclay, AP-HP, Service de radiologie diagnostique et interventionnelle, Hôpital de Bicêtre, DMU 14 Smart Imaging, BioMaps, Le Kremlin-Bicêtre, France
- 212  
213 102. Dr. Teodor VASILE, Université Paris-Saclay, AP-HP, Service de radiologie diagnostique et interventionnelle, Hôpital de Bicêtre, DMU 14 Smart Imaging, BioMaps, Le Kremlin-Bicêtre, France
- 214  
215 103. Dr. Cristina BALASA, Université Paris-Saclay, AP-HP, Service de radiologie diagnostique et interventionnelle, Hôpital de Bicêtre, DMU 14 Smart Imaging, BioMaps, Le Kremlin-Bicêtre, France
- 216  
217  
218 104. Prof. Cécile GOJJARD, Université Paris-Saclay, AP-HP, Service de médecine interne et immunologie clinique, Hôpital de Bicêtre, DMU 7 Endocrinologie-immunités-inflammations-cancer-urgences, INSERM U1018, CESP (Centre de Recherche en Epidémiologie et Santé des Populations), Le Kremlin-Bicêtre, France
- 219  
220 105. Dr. Christelle CHANTALAT-AUGER, Université Paris-Saclay, AP-HP, Service de médecine interne et immunologie clinique, Hôpital de Bicêtre, DMU 7 Endocrinologie-immunités-inflammations-cancer-urgences, Le Kremlin-Bicêtre, France
- 221  
222 106. Dr. Antoine CHERET, Université Paris-Saclay, AP-HP, Service de médecine interne et immunologie clinique, Hôpital de Bicêtre, DMU 7 Endocrinologie-immunités-inflammations-cancer-urgences, Le Kremlin-Bicêtre, France
- 223  
224 107. Dr. Fanny URBAIN, Université Paris-Saclay, AP-HP, Service de médecine interne et immunologie clinique, Hôpital de Bicêtre, DMU 7 Endocrinologie-immunités-inflammations-cancer-urgences, Le Kremlin-Bicêtre, France
- 225  
226 108. Dr. Ariane LAPARRA, Université Paris-Saclay, AP-HP, Service de médecine interne et immunologie clinique, Hôpital de Bicêtre, DMU 7 Endocrinologie-immunités-inflammations-cancer-urgences, Le Kremlin-Bicêtre, France
- 227  
228 109. Dr. Venceslas BOURDIN, Université Paris-Saclay, AP-HP, Service de médecine interne et immunologie clinique, Hôpital de Bicêtre, DMU 7 Endocrinologie-immunités-inflammations-cancer-urgences, Le Kremlin-Bicêtre, France

- 229 110. Dr. Daphné CUVEILLIER, Université Paris-Saclay, AP-HP, Service de médecine interne et immunologie clinique, Hôpital de Bicêtre, DMU  
230 7 Endocrinologie-immunités-inflammations-cancer-urgences, Le Kremlin-Bicêtre, France
- 231 111. Dr. Jeremy GOTTLIEB, Université Paris-Saclay, AP-HP, Service de médecine interne et immunologie clinique, Hôpital de Bicêtre, DMU7  
232 Endocrinologie-immunités-inflammations-cancer-urgences, Le Kremlin-Bicêtre, France
- 233 112. Dr. Stéphane DIEZ, Université Paris-Saclay, AP-HP, Service d'accueil des urgences, Hôpital de Bicêtre, DMU 7 Endocrinologie-immunités-  
234 inflammations-cancer-urgences, Le Kremlin-Bicêtre, France
- 235 113. Dr. Etienne HINGLAIS, Université Paris-Saclay, AP-HP, Service d'accueil des urgences, Hôpital de Bicêtre, DMU 7 Endocrinologie-  
236 immunités-inflammations-cancer-urgences, Le Kremlin-Bicêtre, France
- 237 114. Dr. Christophe VINCENT-CASSY, Université Paris-Saclay, AP-HP, Service d'accueil des urgences, Hôpital de Bicêtre, DMU 7 Endocrinologie-  
238 immunités-inflammations-cancer-urgences, Le Kremlin-Bicêtre, France
- 239 115. Dr. Lydie NGUYEN, Université Paris-Saclay, AP-HP, Service d'accueil des urgences, Hôpital de Bicêtre, DMU 7 Endocrinologie-immunités-  
240 inflammations-cancer-urgences, Le Kremlin-Bicêtre, France
- 241 116. Dr. Faraj NIKPAY, Université Paris-Saclay, AP-HP, Service d'accueil des urgences, Hôpital de Bicêtre, DMU 7 Endocrinologie-immunités-  
242 inflammations-cancer-urgences, Le Kremlin-Bicêtre, France
- 243 117. Dr. Jacqueline DEPRET-VASSAL, Université Paris-Saclay, AP-HP, Service d'accueil des urgences, Hôpital de Bicêtre, DMU 7 Endocrinologie-  
244 immunités-inflammations-cancer-urgences, Le Kremlin-Bicêtre, France
- 245 118. Dr. Rola STEPHAN, Université Paris-Saclay, AP-HP, Service d'accueil des urgences, Hôpital de Bicêtre, DMU 7 Endocrinologie-immunités-  
246 inflammations-cancer-urgences, Le Kremlin-Bicêtre, France
- 247 119. Dr. Patience JOMO, Université Paris-Saclay, AP-HP, Service d'accueil des urgences, Hôpital de Bicêtre, DMU 7 Endocrinologie-immunités-  
248 inflammations-cancer-urgences, Le Kremlin-Bicêtre, France
- 249 120. Dr. Maryvonne MARINEAU, Université Paris-Saclay, AP-HP, Service d'accueil des urgences, Hôpital de Bicêtre, DMU 7 Endocrinologie-  
250 immunités-inflammations-cancer-urgences, Le Kremlin-Bicêtre, France
- 251 121. Dr. Djalila GACEMI, Université Paris-Saclay, AP-HP, Service d'accueil des urgences, Hôpital de Bicêtre, DMU 7 Endocrinologie-immunités-  
252 inflammations-cancer-urgences, Le Kremlin-Bicêtre, France
- 253 122. Dr. Amina SEMATI, Université Paris-Saclay, AP-HP, Service d'accueil des urgences, Hôpital de Bicêtre, DMU 7 Endocrinologie-immunités-  
254 inflammations-cancer-urgences, Le Kremlin-Bicêtre, France
- 255 123. Dr. Ciprian SIMISDEAN, Université Paris-Saclay, AP-HP, Service d'accueil des urgences, Hôpital de Bicêtre, DMU 7 Endocrinologie-  
256 immunités-inflammations-cancer-urgences, Le Kremlin-Bicêtre, France
- 257 124. Dr. Yamina DJEBBAR, Université Paris-Saclay, AP-HP, Service d'accueil des urgences, Hôpital de Bicêtre, DMU 7 Endocrinologie-  
258 immunités-inflammations-cancer-urgences, Le Kremlin-Bicêtre, France
- 259 125. Dr. Hasna BAYOUB, Université Paris-Saclay, AP-HP, Service d'accueil des urgences, Hôpital de Bicêtre, DMU 7 Endocrinologie-immunités-  
260 inflammations-cancer-urgences, Le Kremlin-Bicêtre, France
- 261 126. Dr. Yves MBEDE, Université Paris-Saclay, AP-HP, Service d'accueil des urgences, Hôpital de Bicêtre, DMU 7 Endocrinologie-immunités-  
262 inflammations-cancer-urgences, Le Kremlin-Bicêtre, France
- 263 127. Dr. Maurice RAPHAEL, Université Paris-Saclay, AP-HP, Service d'accueil des urgences, Hôpital de Bicêtre, DMU 7 Endocrinologie-  
264 immunités-inflammations-cancer-urgences, Le Kremlin-Bicêtre, France
- 265 128. Prof. Stéphane JAUREGUIBERRY, Université Paris-Saclay, AP-HP, Service des maladies infectieuses et tropicales, Hôpital de Bicêtre, DMU  
266 7 Endocrinologie-immunités-inflammations-cancer-urgences, INSERM U1018, CESP (Centre de Recherche en Epidémiologie et Santé des  
267 Populations), Le Kremlin-Bicêtre, France
- 268 129. Dr. Rocco COLLARINO, Université Paris-Saclay, AP-HP, Service des maladies infectieuses et tropicales, Hôpital de Bicêtre, DMU 7  
269 Endocrinologie-immunités-inflammations-cancer-urgences, INSERM U1018, CESP (Centre de Recherche en Epidémiologie et Santé des  
270 Populations), Le Kremlin-Bicêtre, France
- 271 130. Dr. Iryna BUKREYEVA, Université Paris-Saclay, AP-HP, Service des maladies infectieuses et tropicales, Hôpital de Bicêtre, DMU 7  
272 Endocrinologie-immunités-inflammations-cancer-urgences, INSERM U1018, CESP (Centre de Recherche en Epidémiologie et Santé des  
273 Populations), Le Kremlin-Bicêtre, France
- 274 131. Dr. Lélia ESCAUT, Université Paris-Saclay, AP-HP, Service des maladies infectieuses et tropicales, Hôpital de Bicêtre, DMU 7  
275 Endocrinologie-immunités-inflammations-cancer-urgences, INSERM U1018, CESP (Centre de Recherche en Epidémiologie et Santé des  
276 Populations), Le Kremlin-Bicêtre, France
- 277 132. Dr. Ouda DERRADJI, Université Paris-Saclay, AP-HP, Service des maladies infectieuses et tropicales, Hôpital de Bicêtre, DMU 7  
278 Endocrinologie-immunités-inflammations-cancer-urgences, INSERM U1018, CESP (Centre de Recherche en Epidémiologie et Santé des  
279 Populations), Le Kremlin-Bicêtre, France
- 280 133. Prof. Marc HUMBERT, Université Paris-Saclay, AP-HP, Service de pneumologie et soins intensifs respiratoires, Hôpital de Bicêtre, DMU 5  
281 Thorinno, Inserm UMR\_S999, Le Kremlin-Bicêtre, France
- 282 134. Prof. Olivier SITBON, Université Paris-Saclay, AP-HP, Service de pneumologie et soins intensifs respiratoires, Hôpital de Bicêtre, DMU 5  
283 Thorinno, Inserm UMR\_S999, Le Kremlin-Bicêtre, France
- 284 135. Dr. Sophie BULIFON, Université Paris-Saclay, AP-HP, Service de pneumologie et soins intensifs respiratoires, Hôpital de Bicêtre, DMU 5  
285 Thorinno, Inserm UMR\_S999, Le Kremlin-Bicêtre, France

- 286  
287 136. Dr. Céline CHERON, Université Paris-Saclay, AP-HP, Service de pneumologie et soins intensifs respiratoires, Hôpital de Bicêtre, DMU 5 Thorinno, Inserm UMR\_S999, Le Kremlin-Bicêtre, France
- 288  
289 137. Dr. Mitja JEVNIKAR, Université Paris-Saclay, AP-HP, Service de pneumologie et soins intensifs respiratoires, Hôpital de Bicêtre, DMU 5 Thorinno, Inserm UMR\_S999, Le Kremlin-Bicêtre, France
- 290  
291 138. Dr. Xavier JAÏS, Université Paris-Saclay, AP-HP, Service de pneumologie et soins intensifs respiratoires, Hôpital de Bicêtre, DMU 5 Thorinno, Inserm UMR\_S999, Le Kremlin-Bicêtre, France
- 292  
293 139. Dr. Etienne-Marie JUTANT, Université Paris-Saclay, AP-HP, Service de pneumologie et soins intensifs respiratoires, Hôpital de Bicêtre, DMU 5 Thorinno, Inserm UMR\_S999, Le Kremlin-Bicêtre, France
- 294  
295 140. Dr. Florence PARENT, Université Paris-Saclay, AP-HP, Service de pneumologie et soins intensifs respiratoires, Hôpital de Bicêtre, DMU 5 Thorinno, Inserm UMR\_S999, Le Kremlin-Bicêtre, France
- 296  
297 141. Dr. Mariana PREDA, Université Paris-Saclay, AP-HP, Service de pneumologie et soins intensifs respiratoires, Hôpital de Bicêtre, DMU 5 Thorinno, Inserm UMR\_S999, Le Kremlin-Bicêtre, France
- 298  
299 142. Dr. Andrei SEFERIAN, Université Paris-Saclay, AP-HP, Service de pneumologie et soins intensifs respiratoires, Hôpital de Bicêtre, DMU 5 Thorinno, Inserm UMR\_S999, Le Kremlin-Bicêtre, France
- 300  
301 143. Dr. Sabina SOLINAS, Université Paris-Saclay, AP-HP, Service de pneumologie et soins intensifs respiratoires, Hôpital de Bicêtre, DMU 5 Thorinno, Inserm UMR\_S999, Le Kremlin-Bicêtre, France
- 302  
303 144. Dr. Athénaïs BOUCLY, Université Paris-Saclay, AP-HP, Service de pneumologie et soins intensifs respiratoires, Hôpital de Bicêtre, DMU 5 Thorinno, Inserm UMR\_S999, Le Kremlin-Bicêtre, France
- 304  
305 145. Dr. Charles FAUVEL, Université Paris-Saclay, AP-HP, Service de pneumologie et soins intensifs respiratoires, Hôpital de Bicêtre, DMU 5 Thorinno, Inserm UMR\_S999, Le Kremlin-Bicêtre, France
- 306  
307 146. Dr. Thomas LACOSTE, Université Paris-Saclay, AP-HP, Service de pneumologie et soins intensifs respiratoires, Hôpital de Bicêtre, DMU 5 Thorinno, Inserm UMR\_S999, Le Kremlin-Bicêtre, France
- 308  
309 147. Dr. Jérémie PICHON, Université Paris-Saclay, AP-HP, Service de pneumologie et soins intensifs respiratoires, Hôpital de Bicêtre, DMU 5 Thorinno, Inserm UMR\_S999, Le Kremlin-Bicêtre, France
- 310  
311 148. Dr. Hélène PRINGUEZ, Université Paris-Saclay, AP-HP, Service de pneumologie et soins intensifs respiratoires, Hôpital de Bicêtre, DMU 5 Thorinno, Inserm UMR\_S999, Le Kremlin-Bicêtre, France
- 312  
313 149. Dr. Renaud SNANOUDJ, Université Paris-Saclay, AP-HP, Service de néphrologie transplantation, Hôpital de Bicêtre, DMU 4 CORREVE Maladies du cœur et des vaisseaux, Le Kremlin-Bicêtre, France
- 314  
315 150. Dr. Hélène DOBOSZIEWICZ, Université Paris-Saclay, AP-HP, Service de néphrologie transplantation, Hôpital de Bicêtre, DMU 4 CORREVE Maladies du cœur et des vaisseaux, Le Kremlin-Bicêtre, France
- 316  
317 151. Dr. Matthieu GUILLET, Université Paris-Saclay, AP-HP, Service de néphrologie transplantation, Hôpital de Bicêtre, DMU 4 CORREVE Maladies du cœur et des vaisseaux, Le Kremlin-Bicêtre, France
- 318  
319 152. Dr. Marwa LAIFI, Université Paris-Saclay, AP-HP, Service de néphrologie transplantation, Hôpital de Bicêtre, DMU 4 CORREVE Maladies du cœur et des vaisseaux, Le Kremlin-Bicêtre, France
- 320  
321 153. Dr. Edouard LEFEVRE, Université Paris-Saclay, AP-HP, Service de néphrologie transplantation, Hôpital de Bicêtre, DMU 4 CORREVE Maladies du cœur et des vaisseaux, Le Kremlin-Bicêtre, France
- 322  
323 154. Dr. Alexandre DORMOY, Université Paris-Saclay, AP-HP, Service d'endocrinologie et des maladies de la reproduction, Hôpital de Bicêtre, DMU 7 Endocrinologie-immunités-inflammations-cancer-urgences, Le Kremlin-Bicêtre, France
- 324  
325 155. Dr. Alexandre VIRONE, Université Paris-Saclay, AP-HP, Service de rhumatologie, Hôpital de Bicêtre, DMU 7 Endocrinologie-immunités-inflammations-cancer-urgences, Le Kremlin-Bicêtre, France
- 326  
327 156. Dr. Julien HENRY, Université Paris-Saclay, AP-HP, Service de rhumatologie, Hôpital de Bicêtre, DMU 7 Endocrinologie-immunités-inflammations-cancer-urgences, Le Kremlin-Bicêtre, France
- 328  
329 157. Dr. Gaetane NOCTURNE, Université Paris-Saclay, AP-HP, Service de rhumatologie, Hôpital de Bicêtre, DMU 7 Endocrinologie-immunités-inflammations-cancer-urgences, Le Kremlin-Bicêtre, France
- 330  
331 158. Dr. Stephan PAVY, Université Paris-Saclay, AP-HP, Service de rhumatologie, Hôpital de Bicêtre, DMU 7 Endocrinologie-immunités-inflammations-cancer-urgences, Le Kremlin-Bicêtre, France
- 332  
333 159. Dr. Christophe BELLANGER Université Paris-Saclay, AP-HP, Service d'urologie, Hôpital de Bicêtre, DMU 6 Maladies et cancers du foie, de l'appareil digestif et urinaire – transplantation - nutrition, Le Kremlin-Bicêtre, France
- 334  
335 160. Dr. Liza KASSOURI Université Paris-Saclay, AP-HP, Service d'urologie, Hôpital de Bicêtre, DMU 6 Maladies et cancers du foie, de l'appareil digestif et urinaire – transplantation - nutrition, Le Kremlin-Bicêtre, France
- 336  
337 161. Dr. Lise DURANTEAU, Université Paris-Saclay, AP-HP, Service de gynécologie-obstétrique, Hôpital de Bicêtre, DMU 2 Sante de la Femme et du Nouveau-Né
- 338  
339 162. Dr. Jennifer FLANDRIN, Université Paris-Saclay, AP-HP, Service de gynécologie-obstétrique, Hôpital de Bicêtre, DMU 2 Sante de la Femme et du Nouveau-Né
- 340  
341 163. Dr. Alicia GARNIER, Université Paris-Saclay, AP-HP, Service de gynécologie-obstétrique, Hôpital de Bicêtre, DMU 2 Sante de la Femme et du Nouveau-Né

- 342 164. Dr. Adeline NOT, Université Paris-Saclay, AP-HP, Service de neurologie, Hôpital de Bicêtre, DMU 9 Neurosciences, Le Kremlin-Bicêtre,  
343 France
- 344 165. Dr. Cécile CAUQUIL, Université Paris-Saclay, AP-HP, Service de neurologie, Hôpital de Bicêtre, DMU 9 Neurosciences, Le Kremlin-Bicêtre,  
345 France
- 346 166. Dr. Céline LABEYRIE, Université Paris-Saclay, AP-HP, Service de neurologie, Hôpital de Bicêtre, DMU 9 Neurosciences, Le Kremlin-Bicêtre,  
347 France
- 348 167. Dr. Constance RABEL, Université Paris-Saclay, AP-HP, Service de neurologie, Hôpital de Bicêtre, DMU 9 Neurosciences, Le Kremlin-  
349 Bicêtre, France
- 350 168. Dr. Jérémie BENICHO, Université Paris-Saclay, AP-HP, Service d'ophtalmologie, Hôpital de Bicêtre, DMU 7 endocrinologie-immunités-  
351 inflammations-cancer-urgences, Le Kremlin-Bicêtre, France
- 352 169. Dr. Cédric LEBACLE, Université Paris-Saclay, AP-HP, Service d'urologie, Hôpital de Bicêtre, DMU 6 Maladies et cancers du foie, de  
353 l'appareil digestif et urinaire - transplantation - nutrition, Le Kremlin-Bicêtre, France
- 354 170. Dr. Delphine TAUSSIG, Université Paris-Saclay, AP-HP, Service de gériatrie aiguë, Hôpital de Bicêtre, DMU 1 Médecine territoire gériatrie,  
355 Le Kremlin-Bicêtre, France
- 356 171. Dr. Pauline RABIER-LEBRUN, Université Paris-Saclay, AP-HP, Service de gériatrie aiguë, Hôpital de Bicêtre, DMU 1 Médecine territoire  
357 gériatrie, Le Kremlin-Bicêtre, France
- 358 172. Dr. Catherine SAGOT, Université Paris-Saclay, AP-HP, Service de gériatrie aiguë, Hôpital de Bicêtre, DMU 1 Médecine territoire gériatrie,  
359 Le Kremlin-Bicêtre, France
- 360 173. Dr. Mary SOUDANI, Université Paris-Saclay, AP-HP, Service de gériatrie aiguë, Hôpital de Bicêtre, DMU 1 Médecine territoire gériatrie,  
361 Le Kremlin-Bicêtre, France
- 362 174. Prof. Charles COURT, Université Paris-Saclay, AP-HP, Service de chirurgie orthopédique et traumatologique, Hôpital de Bicêtre, DMU 10  
363 Chirurgie orthopédique-chirurgie plastique-reconstruction, Le Kremlin-Bicêtre, France
- 364 175. Dr. Véronique MOLINA, Université Paris-Saclay, AP-HP, Service de chirurgie orthopédique et traumatologique, Hôpital de Bicêtre, DMU  
365 10 Chirurgie orthopédique-chirurgie plastique-reconstruction, Le Kremlin-Bicêtre, France
- 366 176. Dr. Charlie BOUTHORS, Université Paris-Saclay, AP-HP, Service de chirurgie orthopédique et traumatologique, Hôpital de Bicêtre, DMU  
367 10 Chirurgie orthopédique-chirurgie plastique-reconstruction, Le Kremlin-Bicêtre, France
- 368 177. Prof. Philippe CHANSON, Université Paris-Saclay, AP-HP, Service d'endocrinologie et des maladies de la reproduction, Hôpital de Bicêtre,  
369 DMU 7 Endocrinologie-immunités-inflammations-cancer-urgences, Le Kremlin-Bicêtre, France
- 370 178. Dr. Alexandre DORMOY, Université Paris-Saclay, AP-HP, Service d'endocrinologie et des maladies de la reproduction, Hôpital de Bicêtre,  
371 DMU 7 Endocrinologie-immunités-inflammations-cancer-urgences, Le Kremlin-Bicêtre, France
- 372 179. Dr. Sylvie SALENAVE, Université Paris-Saclay, AP-HP, Service d'endocrinologie et des maladies de la reproduction, Hôpital de Bicêtre,  
373 DMU 7 Endocrinologie-immunités-inflammations-cancer-urgences, Le Kremlin-Bicêtre, France
- 374 180. Dr. Carine RICHA, Université Paris-Saclay, AP-HP, Service d'endocrinologie et des maladies de la reproduction, Hôpital de Bicêtre, DMU  
375 7 Endocrinologie-immunités-inflammations-cancer-urgences, Le Kremlin-Bicêtre, France
- 376 181. Dr. Claire BOUVATTIER, Université Paris-Saclay, AP-HP, Service d'endocrinologie et diabète de l'enfant, Hôpital de Bicêtre, DMU 3 Santé  
377 de l'enfant et de l'adolescent, INSERM U1185, Le Kremlin-Bicêtre, France
- 378 182. Dr. Anya ROTHENBUHLER, Université Paris-Saclay, AP-HP, Service d'endocrinologie et diabète de l'enfant, Hôpital de Bicêtre, DMU 3  
379 Santé de l'enfant et de l'adolescent, INSERM U1185, Le Kremlin-Bicêtre, France
- 380 183. Dr. Cécile BIBAL, Université Paris-Saclay, AP-HP, Service d'endocrinologie et diabète de l'enfant, Hôpital de Bicêtre, DMU 3 Santé de  
381 l'enfant et de l'adolescent, INSERM U1185, Le Kremlin-Bicêtre, France
- 382 184. Dr. Guillaume MORELLE, Université Paris-Saclay, AP-HP, Service de pédiatrie polyvalente Hôpital de Bicêtre, DMU 3 Santé de l'enfant et  
383 de l'adolescent, Le Kremlin-Bicêtre, France
- 384 185. Dr. Tamazoust GUIDDIR, Université Paris-Saclay, AP-HP, Service de pédiatrie polyvalente Hôpital de Bicêtre, DMU 3 Santé de l'enfant et  
385 de l'adolescent, Le Kremlin-Bicêtre, France
- 386 186. Dr. Martin AUGER, Université Paris-Saclay, AP-HP, Service de pédiatrie polyvalente Hôpital de Bicêtre, DMU 3 Santé de l'enfant et de  
387 l'adolescent, Le Kremlin-Bicêtre, France
- 388 187. Dr. Delphine REGNARD, Université Paris-Saclay, AP-HP, Service de pédiatrie polyvalente Hôpital de Bicêtre, DMU 3 Santé de l'enfant et  
389 de l'adolescent, Le Kremlin-Bicêtre, France
- 390 188. Dr. Léa GOMEZ Université Paris-Saclay, AP-HP, Service de médecine nucléaire, Hôpital de Bicêtre, DMU 14 Smart imaging, Le Kremlin-  
391 Bicêtre, France
- 392 189. Dr. Florent BESSON, Université Paris-Saclay, AP-HP, Service de médecine nucléaire, Hôpital de Bicêtre, DMU 14 Smart imaging, Le  
393 Kremlin-Bicêtre, France
- 394 190. Dr. Marie FRANK, Université Paris-Saclay, AP-HP, Département d'Information Médicale, Hôpital de Bicêtre, DMU 13 Santé Publique –  
395 Information Médicale et appui à la recherche clinique, Le Kremlin-Bicêtre, France
- 396
